# Supplementary material
Source: ML conference proceedings conference paper supplement (https://openreview.net/forum?id=hDx3pFaYeH)
Supplement: supplementary_material [file KDS_NeurIPS_full_paper_with_supplement.pdf › KDS_supplement/KDS_NeurIPS_full_paper_with_supplement.pdf]

---

# Kernel Density Steering: Inference-Time Scaling via Mode Seeking for Image Restoration

---

Anonymous Author(s)

Affiliation

Address

email

## Abstract

Diffusion models show promise for image restoration, but existing methods often struggle with inconsistent fidelity and undesirable artifacts. To address this, we introduce Kernel Density Steering (KDS), a novel inference-time framework promoting robust, high-fidelity outputs through explicit local mode-seeking. KDS employs an  $N$ -particle ensemble of diffusion samples, computing patch-wise kernel density estimation gradients from their collective outputs. These gradients steer patches in each particle towards shared, higher-density regions identified within the ensemble. This collective local mode-seeking mechanism, acting as "collective wisdom", steers samples away from spurious modes prone to artifacts, arising from independent sampling or model imperfections, and towards more robust, high-fidelity structures. This allows us to obtain better quality samples at the expense of higher compute by simultaneously sampling multiple particles. As a plug-and-play framework, KDS requires no retraining or external verifiers, seamlessly integrating with various diffusion samplers. Extensive numerical validations demonstrate KDS substantially improves both quantitative and qualitative performance on challenging real-world super-resolution and image inpainting tasks.

## 1 Introduction

Image restoration (IR) seeks to recover a high-quality image  $x$  from its degraded observation  $y$ . Recently, diffusion models (DMs) [1–3] have been successfully applied to challenging IR tasks [4–8], including super-resolution (SR) [9–14], image deblurring [15–17], and image inpainting [18–20]. DMs operate on a dual process: a forward process introduces noise to a clean image  $x$  over  $T$  timesteps, creating a sequence of noisy latents  $z_t$  where  $z_T$  is approximately pure noise. A learned reverse process then iteratively refines these latents from  $z_T$  back to an estimate of  $z_0$ .

To enable DMs for IR task, a straightforward way is to train diffusion models directly conditioned on information  $c$  derived from the low-quality image  $y$  [21–23]. Conditioning can be implemented through various techniques, for example, input concatenation [21], cross-attention [24, 25], adapters like ControlNet [26] or LoRA [27]. This allows the model’s network  $\epsilon_\theta(z_t, t, c)$  to estimate the conditional score function  $\nabla_{z_t} \log p_t(x_t|c)$  to directly approximate target score function  $\nabla_{z_t} \log p_t(z_t|y)$ , enabling standard sampling at inference.

A key challenge here lies in navigating the perception-distortion trade-off [28]. Standard posterior sampling can yield perceptually sharp results, but often suffers from high distortion and hallucinations. Conversely, averaging multiple independent samples approximates the Minimum Mean Squared Error (MMSE) estimate, minimizing average distortion but leading to blurriness and poor perceptual quality [29]. Neither extreme is ideal for high-quality IR. Many existing methods improve this trade-off by additional model training or specialized network architectures [4, 29–34].

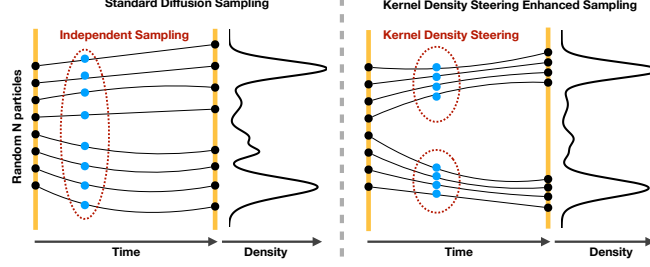

Figure 1: Conceptual illustration of Kernel Density Steering (KDS) for diffusion sampling. Left: Standard diffusion sampling with  $N$  independent particles (blue dots) can result in high variance. Right: KDS utilizes the ensemble of  $N$  particles to estimate local density. It then guides these particles towards shared high-density modes (peaks in the density curve) during the diffusion process.

This paper introduces Kernel Density Steering (KDS), an inference-time framework designed to improve the distortion-perception trade-off without requiring any model retraining. KDS leverages collective information from an  $N$ -particle ensemble by steering particles towards regions of high concentration within the ensemble. To identify these regions, KDS employs Kernel Density Estimation (KDE) [35, 36]. Specifically, at each time step  $t$ , we estimate a smoothed probability density  $\hat{p}_K(z_t|c)$  over the particle ensemble via KDE:

$$\hat{p}_K(z_t|c) = \frac{1}{Nh^d} \sum_{k=1}^N K\left(\frac{\|z_t - z_t^{(k)}\|^2}{h^2}\right), \quad (1)$$

where  $h$  is bandwidth,  $d$  is dimensionality. KDS then steers particles towards the modes of this dynamically estimated density  $\hat{p}_K$ . We hypothesize these modes, areas of strong particle agreement, yield solutions with a better distortion-perception balance. The steering direction for each particle  $z_t^{(i)}$  is the gradient of this log-density:  $\nabla_{z_t} \log \hat{p}_K(z_t^{(i)}|c)$ , which points towards the steepest increase in  $\hat{p}_K(z_t|c)$ . This KDS guidance is added to the standard diffusion sampling update for each particle  $i$ :

$$dz_t^{(i)} = \left[ \underbrace{f(t)z_t^{(i)} - \frac{1}{2}g(t)^2 \nabla_{z_t} \log p_t(z_t^{(i)}|c)}_{\text{Standard Diffusion Update}} \right] dt + \underbrace{\delta_t g(t)^2 \nabla_{z_t} \log \hat{p}_K(z_t^{(i)}|c)}_{\text{Kernel Density Steering Term}} dt, \quad (2)$$

where  $\delta_t$  is the KDS guidance strength. Thus, particles are influenced by the original model's score and concurrently guided by the KDS term, which acts as a form of collaborative filtering across the multiple particles, pushing them towards areas of high ensemble consensus. This adaptive, internal guidance aims for restorations that are both quantitatively accurate and perceptually sharp.

To demonstrate the effectiveness of this approach, we first evaluate KDS's impact on posterior sampling in a controlled synthetic task. Subsequently, we provide extensive empirical validation, showing significant improvements in both quantitative performance and qualitative robustness on challenging real-world SR and inpainting tasks.

**Our contributions are:** (1) We introduce Kernel Density Steering (KDS), a novel ensemble-based, inference time guidance method that uses patch-wise KDE gradients to steer diffusion sampling towards high-density posterior modes. (2) KDS improves the distortion-perception trade-off in image restoration by operating directly on the sampling process without retraining. (3) We design a patch-wise mechanism to overcome the curse of dimensionality, enabling KDS to scale to high-dimensional latent space. (4) Empirical validation showing significant improvements in fidelity, perception, and robustness on challenging real-world super-resolution and inpainting tasks.

## 2 Background

### 2.1 Latent Diffusion Models

Latent Diffusion Models (LDMs) [24] efficiently perform image generation by operating in a lower-dimensional latent space learned by a pre-trained autoencoder [37], mitigating the computational cost



of pixel-space methods on high-resolution images. The autoencoder includes an encoder  $\mathcal{E}$  mapping an image  $x$  to a latent  $z = \mathcal{E}(x)$ , and a decoder  $\mathcal{D}$  mapping  $z$  back to  $\hat{x} = \mathcal{D}(z)$ .

The forward diffusion process gradually adds Gaussian noise to the target latent sample  $z_0 = \mathcal{E}(x_0)$  over  $T$  timesteps according to a noise schedule  $\alpha_t$ . This process results in the following marginal distribution for the latent  $z_t$  at any timestep  $t$ :

$$q(z_t|z_0) := \mathcal{N}(z_t; \sqrt{\bar{\alpha}_t}z_0, (1 - \bar{\alpha}_t)\mathbf{I}), \text{ where } \bar{\alpha}_t = \prod_{s=1}^t \alpha_s. \quad (3)$$

The reverse process aims to generate a clean latent variable  $z_0$  from a noisy latent variable  $z_T \sim \mathcal{N}(0, \mathbf{I})$ . This is achieved by training a neural network  $\epsilon_\theta(z_t, t)$  to predict the noise component  $\epsilon_t$  that was added during the forward process. This predicted noise is directly related to the score function of the noisy latent distribution  $p_t(z_t)$ :  $\nabla_{z_t} \log p_t(z_t) \approx -\frac{1}{\sqrt{1-\bar{\alpha}_t}} \epsilon_\theta(z_t, t)$ . By accurately predicting the noise, the network learns to estimate this score function, thereby implicitly capturing the data distribution  $p(z_t)$  at different noise levels.

To sample from the learned distribution, Denoising Diffusion Implicit Models (DDIM) [38] offer a fast, non-Markovian sampling procedure. The sampling step from  $z_t$  to  $z_{t-1}$  in DDIM, which predicts the latent state at  $t-1$  based on the estimated clean latent at time  $t$ , is given by:

$$z_{t-1} = \sqrt{\bar{\alpha}_{t-1}} \left( \frac{z_t - \sqrt{1 - \bar{\alpha}_t} \epsilon_\theta(z_t, t, c)}{\sqrt{\bar{\alpha}_t}} \right) + \sqrt{1 - \bar{\alpha}_{t-1}} \epsilon_\theta(z_t, t, c). \quad (4)$$

At the end of sampling, the predicted  $z_0$  is then decoded by  $\mathcal{D}$  to obtain the generated image  $\hat{x}_0$ .

## 2.2 LDM for Image restoration

Two primary methods exist for leveraging diffusion models in IR. Conditional LDMs [4–6, 9–11, 15, 16, 18–20, 39], learn the posterior  $p(z|c)$  directly, where the conditioning  $c$  is derived from  $y$ . These models can be highly effective but may face challenges in accurately modeling the true posterior for complex degradations, potentially impacting restoration fidelity. Alternatively, unconditional LDMs can be employed with inference-time guidance using Bayes’ rule [40–44]. These methods typically require computing gradients of the log-likelihood  $\log p(y|x_t)$  (often approximated via the estimate  $\hat{x}_{0|t}$ ). This necessitates knowledge of the degradation process (e.g., the operator  $A$  in  $y \approx Ax$ ), limiting their applicability in scenarios where the degradation is unknown or cannot be accurately modeled which is the case in many real-world image SR or deblurring.

## 2.3 Inference-Time Scaling in Diffusion Models

Merely increasing the number of denoising steps (NFEs) for a single sample yields diminishing returns [45], motivating research into more effective inference-time strategies [46, 47]. One prominent avenue, particularly explored in Text-to-Image (T2I) generation, involves actively searching for optimal initial noise vectors ( $z_T$ ) or resampling generation trajectories, often guided by external verifiers (e.g., CLIP score, pre-trained classifiers) to build a reward function and select promising candidates [46, 47]. However, this introduces reliance on these external verifiers, which can suffer from biases or misalignment with the true image restoration (IR) target.

A second class of strategies are specifically designed for imaging inverse problems. These often employ ensemble methods, such as those based on Sequential Monte Carlo (SMC) techniques [48–51], employ likelihood approximation and reweighting sampling trajectories to achieve more accurate approximation of the posterior distribution  $p(x|y)$  with unconditional DMs. These approaches, however, require accurate knowledge of the degradation model specific to the IR task. This assumption is often invalid in many real-world applications, such as real-world image SR and deblurring.

In contrast to both these approaches, KDS introduces an ensemble method that operates without external verifiers or the need for the knowledge of degradation model. By focusing on internal consensus guidance derived directly from particle interactions within the ensemble, KDS offers a more robust and broadly applicable solution for enhancing image restoration quality.

## 2.4 Mean Shift for Mode Seeking

Mean Shift [52, 53] is a non-parametric clustering and mode-seeking algorithm. Given a set of points  $\{\mathbf{x}_k\}_{k=1}^N$ , the goal is to find the modes (local maxima) of the underlying density function. The algorithm iteratively shifts each point towards the local mean of points within its neighborhood, weighted by a kernel function (often Gaussian). For a point  $\mathbf{x}$  and a kernel  $K$  with bandwidth  $h$ , the mean shift vector is calculated as:

$$\mathbf{m}(\mathbf{x}) = \frac{\sum_{k=1}^N K\left(\frac{\|\mathbf{x}-\mathbf{x}_k\|^2}{h^2}\right) \mathbf{x}_k}{\sum_{k=1}^N K\left(\frac{\|\mathbf{x}-\mathbf{x}_k\|^2}{h^2}\right)} - \mathbf{x}. \quad (5)$$

A crucial property of the mean shift vector,  $\mathbf{m}(\mathbf{x})$ , is its direct proportionality to the gradient of the logarithm of the Kernel Density Estimate (KDE):  $\mathbf{m}(\mathbf{x}) \propto \nabla_{\mathbf{x}} \log \hat{p}_K(\mathbf{x})$ . Therefore, iteratively updating a point by adding its mean shift vector ( $\mathbf{x} \leftarrow \mathbf{x} + \mathbf{m}(\mathbf{x})$ ) is an effective method for performing gradient ascent on the KDE, guiding the point towards a local mode of the estimated density. This established connection is leveraged in our proposed KDS framework.

## 3 Kernel Density Steering for Diffusion Samplers

Kernel Density Steering (KDS) is an inference-time technique for Image Restoration that enhances diffusion model sampling by leveraging an  $N$ -particle latent ensemble,  $\mathbf{Z}_t = \{\mathbf{z}_t^{(i)}\}_{i=1}^N$ . Standard diffusion sampling can result in outputs with inconsistent fidelity and undesirable artifacts. KDS addresses this by guiding all particles towards regions of high consensus within their own ensemble which is hypothesized to lead to more robust and high-fidelity restorations.

KDS achieves this ensemble-driven mode-seeking by incorporating an additional steering term into the sampling update for each particle. This steering is inspired by the Mean Shift algorithm (Sec. 2.4). Specifically, for each particle, KDS computes a mean shift vector  $\mathbf{m}(\mathbf{z}_t^{(i)})$  based on the current ensemble  $\mathbf{Z}_t$ . Then KDS steering is then applied by taking a step in the direction of this mean shift vector, which directs to a local mode of the ensemble’s Kernel Density Estimate (KDE).

### 3.1 Patch-wise Mechanism and Integration

Directly applying KDE and mean shift in the full, high-dimensional latent space  $\mathbf{z}_t$  is not achievable. A prohibitively large number of particles would be needed to obtain a reasonable density estimate via KDE in such high-dimensional spaces. To address this, we introduce a patch-wise mechanism to apply the KDS principle to smaller, more manageable, lower-dimensional patches. These patches are extracted from the predicted clean latent state  $\hat{\mathbf{z}}_{0|t}^{(i)}$  corresponding to each particle  $\mathbf{z}_t^{(i)}$  in the ensemble. This predicted clean latent,  $\hat{\mathbf{z}}_{0|t}^{(i)}$ , is the output of the diffusion model’s denoising step at time  $t$ , obtained via:

$$\hat{\mathbf{z}}_{0|t}^{(i)} = \frac{1}{\sqrt{\bar{\alpha}_t}} \left( \mathbf{z}_t^{(i)} - \sqrt{1 - \bar{\alpha}_t} \epsilon_{\theta}(\mathbf{z}_t^{(i)}, t, c) \right). \quad (6)$$

**Patch-wise Mechanism:** To the ensemble of predicted clean latent states  $\{\hat{\mathbf{z}}_{0|t}^{(i)}\}_{i=1}^N$ , our patch-wise mechanism involves the following steps at each timestep  $t$ :

1. *Patch Extraction:* For each predicted clean latent  $\hat{\mathbf{z}}_{0|t}^{(i)}$  in the ensemble (obtained from Eq. 6), extract a set of non-overlapped patches  $\{\mathbf{p}_j^{(i)}\}_j$  where we have omitted the time index to simplify the notation. This yields an ensemble of corresponding patches  $\mathbf{P}_j = \{\mathbf{p}_j^{(k)}\}_{k=1}^N$  for each given spatial patch location  $j$ .
2. *Compute and Apply Patch-wise Steering:* For each patch  $\mathbf{p}_j^{(i)}$  (from particle  $i$  at location  $j$ ), its mean shift vector  $\mathbf{m}(\mathbf{p}_j^{(i)})$  is first computed based on the local ensemble of corresponding patches  $\mathbf{P}_j = \{\mathbf{p}_j^{(k)}\}_{k=1}^N$ . This vector, which directs the patch towards a region of higher consensus

149 within the ensemble, is given by:

$$\mathbf{m}(\mathbf{p}_j^{(i)}) = \frac{\sum_{k=1}^N G\left(\frac{\|\mathbf{p}_j^{(i)} - \mathbf{p}_j^{(k)}\|^2}{h^2}\right) \mathbf{p}_j^{(k)}}{\sum_{k=1}^N G\left(\frac{\|\mathbf{p}_j^{(i)} - \mathbf{p}_j^{(k)}\|^2}{h^2}\right)} - \mathbf{p}_j^{(i)}. \quad (7)$$

150 Here,  $G$  is a Gaussian kernel function and  $h$  is the bandwidth hyperparameter. As discussed in  
 151 Sec. 2.4, this vector  $\mathbf{m}(\mathbf{p}_j^{(i)})$  points from the current patch towards the estimated local mode of  
 152 its ensemble’s density. This computed mean shift vector is then used to update the patch:

$$\hat{\mathbf{p}}_j^{(i),\text{KDS}} \leftarrow \mathbf{p}_j^{(i)} + \delta_t \mathbf{m}(\mathbf{p}_j^{(i)}), \quad (8)$$

153 where  $\delta_t \in [0, 1]$  is a time-dependent steering strength.

154 3. *Reconstruct Guided Latent Prediction:* After all patches  $\{\mathbf{p}_j^{(i)}\}_j$  from a given  $\hat{\mathbf{z}}_{0|t}^{(i)}$  have been  
 155 updated to  $\{\hat{\mathbf{p}}_j^{(i),\text{KDS}}\}_j$ , they are reassembled by direct replacement to original coordinate to  
 156 form the KDS-refined clean latent prediction,  $\hat{\mathbf{z}}_{0|t}^{(i),\text{KDS}}$ .

157 **Integration with Diffusion Samplers:** KDS integrates seamlessly with standard diffusion samplers  
 158 (e.g., first-order ODE DDIM solver and high-order ODE DPM-Solver++ [54]). At each sampling  
 159 step  $t$ , the sampler first computes the predicted clean latent for each particle,  $\hat{\mathbf{z}}_{0|t}^{(i)}$ , using (Eq. 6).  
 160 Patch-wise KDS is then applied to this ensemble of predictions  $\{\hat{\mathbf{z}}_{0|t}^{(i)}\}_{i=1}^N$  to produce the ensemble of  
 161 refined predictions  $\{\hat{\mathbf{z}}_{0|t}^{(i),\text{KDS}}\}_{i=1}^N$ . The sampler subsequently uses these KDS-refined estimates to  
 162 compute the next latent states  $\{\mathbf{z}_{t-1}^{(i)}\}_{i=1}^N$ . After the full reverse diffusion process, an ensemble of  
 163 KDS-guided clean latent states  $\{\hat{\mathbf{z}}_0^{(i),\text{KDS}}\}_{i=1}^N$  is obtained.

164 **Final Particle Selection:** To produce a single, representative output image from an ensemble of  
 165 generated candidates  $\{\hat{\mathbf{z}}_0^{(i),\text{KDS}}\}_{i=1}^N$ , a selection is made in the latent space. Our proposed strategy is  
 166 to choose the latent vector from the ensemble that is closest to the ensemble’s mean  $\bar{\mathbf{z}}_0$ :

$$\hat{\mathbf{z}}_0^{\text{selected}} = \arg \min_{\hat{\mathbf{z}}_0^{(i)}} \|\hat{\mathbf{z}}_0^{(i)} - \bar{\mathbf{z}}_0\|^2. \quad (9)$$

167 This selected latent vector  $\hat{\mathbf{z}}_0^{\text{selected}}$  is then transformed by the decoder  $\mathcal{D}$  into the final image  $\hat{\mathbf{x}}_0$ , as  
 168 represented by the equation  $\hat{\mathbf{x}}_0 = \mathcal{D}(\hat{\mathbf{z}}_0^{\text{selected}})$ .

## 169 4 Experiments

170 In this section, we present experiments to numerically evaluate our proposed method. First, we utilize  
 171 a 2D toy example (Sec. 4.1) to visually illustrate the impact of our proposed Kernel Density Steering  
 172 on the diffusion model sampling process, providing intuition for its mechanism. Subsequently,  
 173 we demonstrate the effectiveness and practical applicability of our approach on two challenging  
 174 real-world tasks: image super-resolution (SR) (Sec. 4.2.1) and image inpainting (Sec. 4.2.2).

### 175 4.1 KDS Sampling in a 2D Example Case

176 To visualize KDS’s effect, we consider sampling from a 2D Mixture of Gaussians (MoG) target distri-  
 177 bution  $p(\mathbf{x}_0) = \sum_{c=1}^C \pi_c \mathcal{N}(\mathbf{x}_0; \boldsymbol{\mu}_c, \boldsymbol{\Sigma}_c)$ . In this controlled setting, the exact score  $\nabla_{\mathbf{x}_t} \log p_t(\mathbf{x}_t)$  of  
 178 the noisy distribution is known. KDS is applied by adding its steering term (derived from Eq. 8 using  
 179 the 2D particle states  $\{\mathbf{x}_t^{(i)}\}_{i=1}^N$ ) to the update driven by the exact score within a DDIM sampler. As  
 180 the data dimension here is very low, we let the patch size equal to the full data size.

181 As illustrated in Figure 2, KDS significantly sharpens the resulting sample distribution. Samples  
 182 cluster more tightly around the true mode means ( $\boldsymbol{\mu}_c$ ), effectively reducing the spread (variance)  
 183 of samples within each mode compared to using the exact score alone. This occurs because KDS  
 184 actively guides particles towards their respective mode centers—which correspond to regions of high  
 185 sample density in the ensemble—thereby improving concentration of samples around each mode.

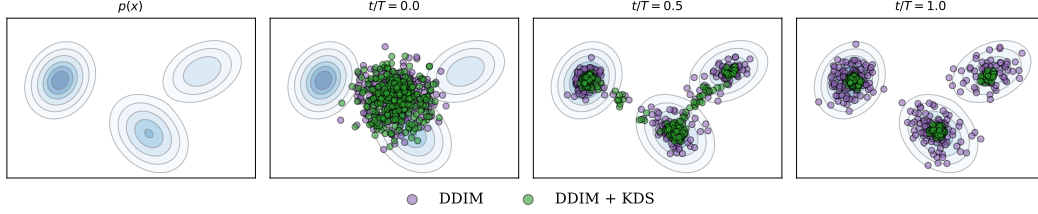

Figure 2: Kernel Density Steering (KDS) sharpens sample distributions in a 2D Mixture of Gaussians (MoG) toy problem. The target distribution  $p(x_0)$  consists of three distinct Gaussian modes. Samples are drawn using DDIM with the exact score function (purple dots) versus DDIM augmented with KDS (green dots,  $N = 50$  particles). KDS guides particles through the reverse diffusion progresses, leading to significantly higher sample concentration at the mode peaks compared to standard DDIM.

Table 1: Super-Resolution Performance on DIV2K dataset with DDIM (50 steps)

| Method             | PSNR         | SSIM         | LPIPS ( $\downarrow$ ) | NIMA         | DISTS ( $\downarrow$ ) | MANIQA       | CLIPQA       | FID ( $\downarrow$ ) |
|--------------------|--------------|--------------|------------------------|--------------|------------------------|--------------|--------------|----------------------|
| LDM-SR             | 22.05        | 0.531        | 0.307                  | 4.922        | 0.179                  | 0.390        | 0.594        | 20.89                |
| + KDS ( $N = 10$ ) | <b>22.37</b> | <b>0.549</b> | <b>0.292</b>           | <b>4.949</b> | <b>0.176</b>           | <b>0.399</b> | <b>0.601</b> | <b>20.78</b>         |
| DiffBIR            | 21.56        | 0.488        | 0.377                  | 5.195        | 0.223                  | 0.566        | 0.730        | 32.28                |
| + KDS ( $N = 10$ ) | <b>22.44</b> | <b>0.535</b> | <b>0.348</b>           | <b>5.219</b> | <b>0.220</b>           | <b>0.571</b> | <b>0.744</b> | <b>30.67</b>         |
| SeeSR              | 22.43        | 0.573        | 0.340                  | 4.902        | 0.200                  | 0.423        | 0.605        | 25.96                |
| + KDS ( $N = 10$ ) | <b>22.79</b> | <b>0.587</b> | <b>0.313</b>           | <b>5.026</b> | <b>0.191</b>           | <b>0.488</b> | <b>0.679</b> | <b>25.44</b>         |

## 4.2 Real-world Image Restoration

To demonstrate the effectiveness of our Kernel Density Steering (KDS), we compare its performance against baseline sampling method on image super-resolution and inpainting tasks. Our experiments utilize two widely used samplers (DDIM, DPM-Solver++). For each configuration, we contrast the results obtained with standard sampling versus KDS-enhanced sampling, ensuring fairness by using the same initial noise. We compare performance with and without KDS, using the same initial noise  $\{z_T^{(i)}\}_{i=1}^N$  for fairness across an ensemble of  $N = 10$  particles unless specified otherwise. Full experimental details, including hyperparameter settings (e.g., patch size, steering strength  $\delta_t$ ) and comprehensive ablation studies, are provided in the Appendix.

Table 2: Super-Resolution Performance on real-world collected datasets with DDIM (50 steps)

| Method             | RealSR       |              |                        |                        |              | DrealSR      |              |                        |                        |              |
|--------------------|--------------|--------------|------------------------|------------------------|--------------|--------------|--------------|------------------------|------------------------|--------------|
|                    | PSNR         | SSIM         | LPIPS ( $\downarrow$ ) | DISTS ( $\downarrow$ ) | CLIPQA       | PSNR         | SSIM         | LPIPS ( $\downarrow$ ) | DISTS ( $\downarrow$ ) | CLIPQA       |
| LDM-SR             | 24.01        | 0.666        | 0.308                  | 0.211                  | <b>0.624</b> | 26.13        | 0.689        | 0.342                  | 0.222                  | 0.610        |
| + KDS ( $N = 10$ ) | <b>24.68</b> | <b>0.703</b> | <b>0.275</b>           | <b>0.201</b>           | 0.622        | <b>26.32</b> | <b>0.702</b> | <b>0.331</b>           | <b>0.317</b>           | <b>0.617</b> |
| DiffBIR            | 23.21        | 0.610        | 0.370                  | 0.250                  | 0.689        | 23.99        | 0.551        | 0.491                  | 0.293                  | <b>0.701</b> |
| + KDS ( $N = 10$ ) | <b>24.39</b> | <b>0.669</b> | <b>0.339</b>           | <b>0.244</b>           | <b>0.692</b> | <b>25.63</b> | <b>0.645</b> | <b>0.422</b>           | <b>0.276</b>           | 0.693        |
| SeeSR              | 24.29        | 0.710        | 0.279                  | <b>0.204</b>           | 0.588        | 26.97        | 0.750        | 0.300                  | 0.218                  | 0.625        |
| + KDS ( $N = 10$ ) | <b>24.50</b> | <b>0.719</b> | <b>0.272</b>           | 0.206                  | <b>0.640</b> | <b>27.42</b> | <b>0.765</b> | <b>0.287</b>           | <b>0.212</b>           | <b>0.651</b> |

### 4.2.1 Real-world Image Super-Resolution

We evaluated the performance of KDS for  $4\times$  real-world super-resolution (SR). This evaluation utilized the LDM-SR [24], DiffBIR [4], and SeeSR [33] backbones across several datasets: DIV2K [55], RealSR [56], DrealSR [57]. Performance was evaluated using a comprehensive suite of metrics, including PSNR, SSIM [58], LPIPS [59], FID [60], NIMA [61], MANIQA [62], and CLIPQA [63].

**Results:** Quantitative results consistently show KDS’s benefits. Tables 1 and Tables 2 demonstrate that adding KDS significantly improves both distortion and perceptual metrics across different datasets, backbones, and samplers (DDIM, DPM-Solver++) compared to the respective baselines

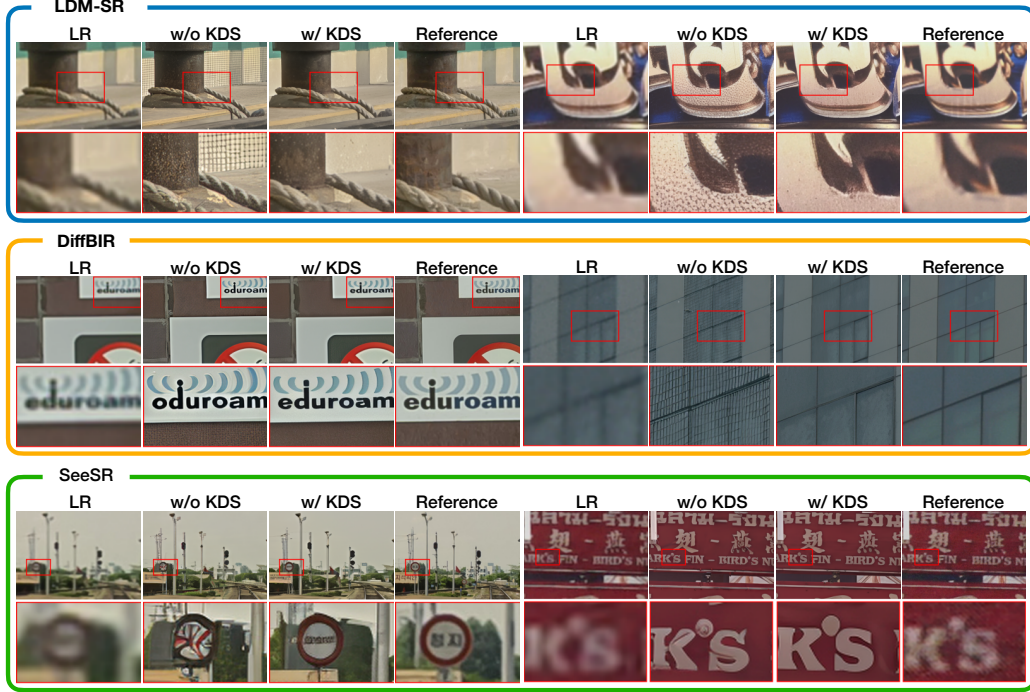

Figure 3: Qualitative comparison of  $4\times$  Real-world Super-Resolution with KDS-enhanced DDIM sampling (Number of Particles  $N = 10$ ). ‘w/o KDS’ shows results from baseline DDIM, while ‘w/ KDS’ shows results with KDS. KDS consistently produces images with improved sharpness, finer details, and reduced artifacts across LDM-SR, DiffBIR, and SeeSR backbones.

without KDS. Qualitative results in Figure 3 corroborate these findings, showing restorations with higher fidelity and fewer artifacts when using KDS.

**Compare with Best-of-N approaches:** While inference-time scaling allows for the generation of multiple candidate solutions, especially beneficial for low-quality inputs, selecting the optimal one from an  $N$ -particle ensemble is non-trivial. As Table 4 shows, using a non-reference metric like LIQE [64] to pick the best particle results in significantly lower performance compared to our Kernel Density Smoothing (KDS) method. This demonstrates that, despite comparable computational costs, traditional post-sampling selection methods do not achieve the same level of performance as KDS.

Table 3: Inpainting Performance on ImageNet with LDM-inpainting backbone.

| Method             | PSNR         | SSIM         | LPIPS(↓)     | FID(↓)       |
|--------------------|--------------|--------------|--------------|--------------|
| DPM-Solver         | 19.94        | 0.725        | 0.144        | 11.70        |
| + KDS ( $N = 10$ ) | <b>21.29</b> | <b>0.747</b> | <b>0.135</b> | <b>11.29</b> |
| DDIM               | 21.03        | 0.736        | 0.140        | 11.47        |
| + KDS ( $N = 10$ ) | <b>21.35</b> | <b>0.748</b> | <b>0.131</b> | <b>11.18</b> |

Table 4: Comparison to Best-of- $N$  (BoN) using LIQE [64] on RealSR with DiffBIR.

| Method | $N$ | PSNR         | LPIPS (↓)    | Time  | Memory |
|--------|-----|--------------|--------------|-------|--------|
| DDIM   | 1   | 23.21        | 0.370        | 7.9s  | 8.0Gb  |
| + BoN  | 5   | 23.72        | 0.361        | 14.9s | 9.7Gb  |
| + KDS  | 5   | <b>24.17</b> | <b>0.349</b> | 15.6s | 9.7Gb  |
| + BoN  | 10  | 23.77        | 0.366        | 27.3s | 10.4Gb |
| + KDS  | 10  | <b>24.39</b> | <b>0.339</b> | 28.4s | 10.4Gb |

## 4.2.2 Image Inpainting

We evaluate the performance of KDS ( $N=10$ ) on a center box inpainting task using the ImageNet dataset. For this task, the central 30% square region of each image is masked. We employ a Latent Diffusion Model (LDM) for inpainting, initialized with weights from a pretrained text-to-image model that matches the architecture and size of Stable Diffusion v2 [24]. The LDM was fine-tuned on ImageNet dataset for random box inpainting. The training utilized a batch size of 1024 and a



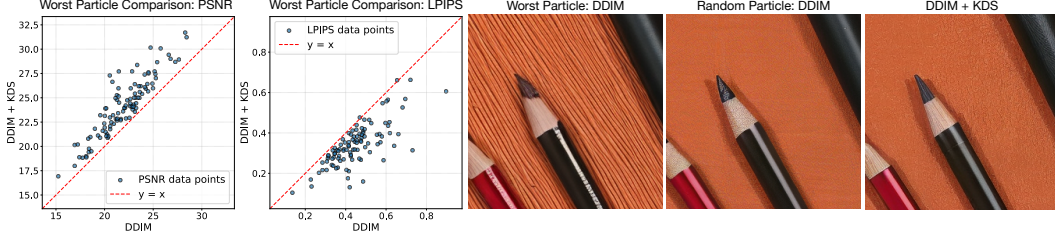

Figure 4: Robustness analysis of KDS on the RealSR dataset. **Left:** Scatter plots comparing the PSNR and LPIPS of the DDIM with KDS versus a worst-performing particle of standard DDIM ensemble ( $N = 10$ ). KDS consistently improves the quality of the worst-case samples. **Right:** Qualitative examples comparing the worst-performing output from a DDIM ensemble with KDS-guided DDIM with the same random seed, demonstrating KDS’s superior consistency and artifact reduction.

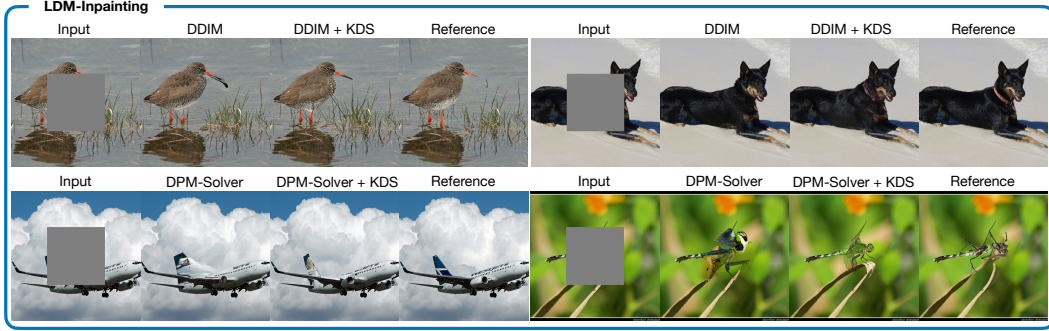

Figure 5: Box-inpainting performance of KDS. KDS generates more coherent and detailed inpainted regions compared to standard DDIM sampling.

217 learning rate of  $1e-4$ , parameters empirically selected to maximize compute efficiency. Performance  
 218 was measured using PSNR, SSIM, LPIPS, and FID.

219 As shown in Table 3, our proposed KDS improves quantitative inpainting performance. Furthermore,  
 220 Figure 5 demonstrates that KDS generates inpainted regions with enhanced fidelity, greater coherence  
 221 with surrounding image content, and more plausible details compared to standard sampling.

### 222 4.3 Analysis of KDS Robustness

223 A key objective of KDS is to enhance the reliability and consistency of diffusion-based restorations,  
 224 particularly by reducing artifacts and improving fidelity.

225 Figure 4 demonstrates this improved stability. The scatter plots (left) compare the performance  
 226 (PSNR and LPIPS) of DDIM enhanced by KDS against the worst-performing particle from a baseline  
 227 DDIM ensemble (also  $N = 10$ ) on RealSR dataset. Points above (PSNR) or below (LPIPS) the  
 228  $y = x$  line signify that KDS improves the worst-case performance. These two scatter plots clearly  
 229 demonstrate enhanced restoration reliability. Qualitative examples (right part of Figure 4) further  
 230 illustrate KDS’s consistency and artifact reduction.

### 231 4.4 Impact of KDS Hyperparameters: Number of Particles and Bandwidth

232 The performance of KDS, as an ensemble-based technique, is inherently linked to its key hyper-  
 233 parameters: the number of particles  $N$  and the kernel bandwidth  $h$ . We analyze their impact on  
 234 SR performance (PSNR, SSIM, LPIPS, FID) using the LDM-SR model on the DIV2K dataset, as  
 235 illustrated in Figure 6.

236 **Number of Particles  $N$ :** Increasing the ensemble size  $N$  consistently enhances restoration quality.  
 237 As shown in Figure 6, both distortion metrics (e.g., PSNR, SSIM) and perceptual metrics (e.g.,  
 238 LPIPS, FID) benefit, particularly as  $N$  increases from small (e.g.,  $N \approx 5 - 10$ ), where kernel density  
 239 estimates are less robust, to moderate (e.g.,  $N \approx 15 - 20$ ) values. While further increasing  $N$  (e.g.,



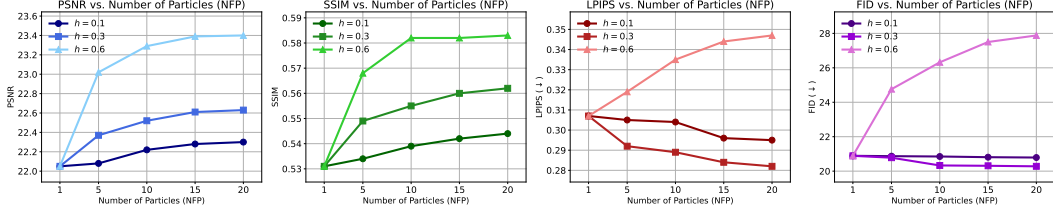

Figure 6: Influence of Particle Number ( $N$ ) and Bandwidth ( $h$ ) on Real-world SR. Performance metrics (PSNR, SSIM, LPIPS, FID) are plotted against the number of particles ( $N$ ) for different bandwidth ( $h$ ) settings on the DIV2K dataset, using LDM-SR backbone with KDS.

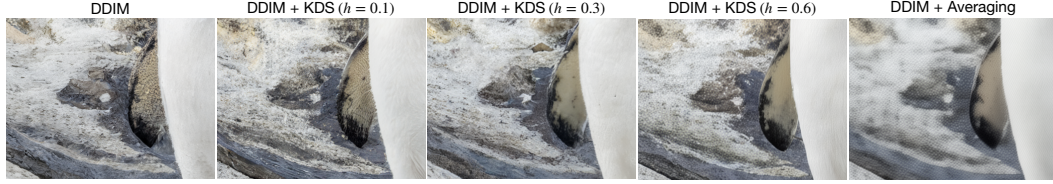

Figure 7: Influence of Bandwidth ( $h$ ) on Real-world SR based on LDM-SR backbone. Note, DDIM + averaging means a post-sampling averaging across the whole ensemble.

beyond  $N > 15$  in depicted scenarios) can yield additional improvements, the gains may become marginal, leading to saturation. This underscores the inherent trade-off between the computational cost, which scales linearly with  $N$ , and the achievable performance boost.

**Kernel Bandwidth  $h$ :** The kernel bandwidth  $h$  plays a crucial role in balancing the perception-distortion trade-off. Figure 6 (different colored lines representing different  $h$  settings) demonstrates that while larger ensembles generally improve performance, the choice of  $h$  is critical. Excessively large bandwidths (e.g.,  $h = 0.6$  in some cases) can lead to over-smoothing, potentially enhancing distortion metrics like PSNR & SSIM at the cost of perceptual quality (higher LPIPS & FID). Conversely, a very small  $h$  might not capture sufficient local consensus. Optimal  $h$  selection is therefore essential for achieving the desired balance between quantitative accuracy and perceptual sharpness. Our experiments suggest that a moderate  $h$  often provides a good compromise.

## 5 Conclusion

This work introduces Kernel Density Steering (KDS), a novel inference-time framework that enhances the fidelity and robustness of diffusion-based image restoration. The core of KDS lies in its local mode seeking strategy: it utilizes an  $N$ -particle ensemble and computes patch-wise kernel density estimation (KDE) gradients from predicted clean latent patches. These gradients guide samples towards shared, high-density regions, effectively steering them away from spurious modes to produce robust, high-fidelity restorations. As a plug-and-play approach, KDS requires no retraining, external verifiers, or explicit degradation models, making it broadly applicable.

**Limitations & Future Work.** Kernel Density Steering (KDS), like other ensemble methods, introduces a computational overhead that scales linearly with the number of particles. While our results indicate that moderate ensemble sizes (e.g.,  $N = 10 - 15$ ) offer a good balance between performance and cost, further research could explore strategies to mitigate this overhead, such as adaptive ensemble sizes or more efficient kernel density estimation techniques. Additionally, the performance of KDS is influenced by the choice of kernel bandwidth ( $h$ ), which requires careful tuning to avoid over-smoothing or insufficient consensus guidance. Future work could investigate adaptive bandwidth selection methods to further optimize performance across diverse image restoration tasks.

## References

- [1] Yang Song and Stefano Ermon, “Generative modeling by estimating gradients of the data distribution,” *Advances in neural information processing systems*, vol. 32, 2019.

- 270 [2] Jonathan Ho, Ajay Jain, and Pieter Abbeel, “Denoising diffusion probabilistic models,” *Advances in*  
271 *neural information processing systems*, vol. 33, pp. 6840–6851, 2020.
- 272 [3] Yang Song, Jascha Sohl-Dickstein, Diederik P Kingma, Abhishek Kumar, Stefano Ermon, and Ben  
273 Poole, “Score-based generative modeling through stochastic differential equations,” *arXiv preprint*  
274 *arXiv:2011.13456*, 2020.
- 275 [4] Xinqi Lin, Jingwen He, Ziyang Chen, Zhaoyang Lyu, Bo Dai, Fanghua Yu, Yu Qiao, Wanli Ouyang, and  
276 Chao Dong, “Diffbir: Toward blind image restoration with generative diffusion prior,” in *European*  
277 *Conference on Computer Vision*. Springer, 2024, pp. 430–448.
- 278 [5] Bin Xia, Yulun Zhang, Shiyin Wang, Yitong Wang, Xinglong Wu, Yapeng Tian, Wenming Yang, and Luc  
279 Van Gool, “Diffir: Efficient diffusion model for image restoration,” in *Proceedings of the IEEE/CVF*  
280 *International Conference on Computer Vision*, 2023, pp. 13095–13105.
- 281 [6] Xin Li, Yulin Ren, Xin Jin, Cuiling Lan, Xingrui Wang, Wenjun Zeng, Xinchao Wang, and Zhibo Chen,  
282 “Diffusion models for image restoration and enhancement—a comprehensive survey,” *arXiv preprint*  
283 *arXiv:2308.09388*, 2023.
- 284 [7] Zhenning Shi, Chen Xu, Changsheng Dong, Bin Pan, Along He, Tao Li, Huazhu Fu, et al., “Resfusion:  
285 Denoising diffusion probabilistic models for image restoration based on prior residual noise,” *Advances in*  
286 *Neural Information Processing Systems*, vol. 37, pp. 130664–130693, 2024.
- 287 [8] Yuyang Hu, Satya VVN Kothapalli, Weijie Gan, Alexander L Sukstanskii, Gregory F Wu, Manu Goyal,  
288 Dmitriy A Yablonskiy, and Ulugbek S Kamilov, “Diffgepci: 3d mri synthesis from mgre signals using 2.5  
289 d diffusion model,” in *2024 IEEE International Symposium on Biomedical Imaging (ISBI)*. IEEE, 2024,  
290 pp. 1–4.
- 291 [9] Chitwan Saharia, Jonathan Ho, William Chan, Tim Salimans, David J Fleet, and Mohammad Norouzi,  
292 “Image super-resolution via iterative refinement,” *IEEE Transactions on Pattern Analysis and Machine*  
293 *Intelligence*, vol. 45, no. 4, pp. 4713–4726, 2022.
- 294 [10] Chitwan Saharia, Jonathan Ho, William Chan, Tim Salimans, David J Fleet, and Mohammad Norouzi,  
295 “Image super-resolution via iterative refinement,” *IEEE Transactions on Pattern Analysis and Machine*  
296 *Intelligence*, vol. 45, no. 4, pp. 4713–4726, 2022.
- 297 [11] Jianyi Wang, Zongsheng Yue, Shangchen Zhou, Kelvin CK Chan, and Chen Change Loy, “Exploiting  
298 diffusion prior for real-world image super-resolution,” *International Journal of Computer Vision*, vol. 132,  
299 no. 12, pp. 5929–5949, 2024.
- 300 [12] Xinyi Zhang, Qiqi Bao, Qingmin Liao, Lu Tian, Zicheng Liu, Zhongdao Wang, Emad Barsoum, et al.,  
301 “Taming diffusion prior for image super-resolution with domain shift sdes,” *Advances in Neural Information*  
302 *Processing Systems*, vol. 37, pp. 42765–42797, 2024.
- 303 [13] Zheng Chen, Haotong Qin, Yong Guo, Xiongfei Su, Xin Yuan, Linghe Kong, and Yulun Zhang, “Binarized  
304 diffusion model for image super-resolution,” in *The Thirty-eighth Annual Conference on Neural Information*  
305 *Processing Systems*.
- 306 [14] Rongyuan Wu, Lingchen Sun, Zhiyuan Ma, and Lei Zhang, “One-step effective diffusion network for  
307 real-world image super-resolution,” *Advances in Neural Information Processing Systems*, vol. 37, pp.  
308 92529–92553, 2024.
- 309 [15] Jay Whang, Mauricio Delbracio, Hossein Talebi, Chitwan Saharia, Alexandros G Dimakis, and Peyman  
310 Milanfar, “Deblurring via stochastic refinement,” in *CVPR*, 2022, pp. 16293–16303.
- 311 [16] Mengwei Ren, Mauricio Delbracio, Hossein Talebi, Guido Gerig, and Peyman Milanfar, “Multiscale  
312 structure guided diffusion for image deblurring,” in *ICCV*, 2023, pp. 10721–10733.
- 313 [17] Zheng Chen, Yulun Zhang, Ding Liu, Jinjin Gu, Linghe Kong, Xin Yuan, et al., “Hierarchical integration  
314 diffusion model for realistic image deblurring,” *Advances in neural information processing systems*, vol.  
315 36, 2024.
- 316 [18] Chitwan Saharia, William Chan, Huiwen Chang, Chris Lee, Jonathan Ho, Tim Salimans, David Fleet, and  
317 Mohammad Norouzi, “Palette: Image-to-image diffusion models,” in *ACM SIGGRAPH 2022 conference*  
318 *proceedings*, 2022, pp. 1–10.
- 319 [19] Andreas Lugmayr, Martin Danelljan, Andres Romero, Fisher Yu, Radu Timofte, and Luc Van Gool,  
320 “Repaint: Inpainting using denoising diffusion probabilistic models,” in *Proceedings of the IEEE/CVF*  
321 *conference on computer vision and pattern recognition*, 2022, pp. 11461–11471.

- [20] Ciprian Corneanu, Raghudeep Gadde, and Aleix M Martinez, “Latentpaint: Image inpainting in latent space with diffusion models,” in *Proceedings of the IEEE/CVF winter conference on applications of computer vision*, 2024, pp. 4334–4343.
- [21] Prafulla Dhariwal and Alex Nichol, “Diffusion models beat gans on image synthesis,” *Neural Information Processing Systems*, 2021.
- [22] Georgios Batzolis, Jan Stanczuk, Carola-Bibiane Schönlieb, and Christian Etmann, “Conditional image generation with score-based diffusion models,” *arXiv preprint arXiv:2111.13606*, 2021.
- [23] Kangfu Mei, Hossein Talebi, Mojtaba Ardakani, Vishal M Patel, Peyman Milanfar, and Mauricio Delbracio, “The power of context: How multimodality improves image super-resolution,” in *Proceedings of the IEEE/CVF Conference on Computer Vision and Pattern Recognition*, 2025.
- [24] Robin Rombach, Andreas Blattmann, Dominik Lorenz, Patrick Esser, and Björn Ommer, “High-resolution image synthesis with latent diffusion models,” in *Proceedings of the IEEE/CVF conference on computer vision and pattern recognition*, 2022, pp. 10684–10695.
- [25] Yuyang Hu, Suhas Lohit, Ulugbek S Kamilov, and Tim K Marks, “Multimodal diffusion bridge with attention-based sar fusion for satellite image cloud removal,” *arXiv preprint arXiv:2504.03607*, 2025.
- [26] Lvmin Zhang, Anyi Rao, and Maneesh Agrawala, “Adding conditional control to text-to-image diffusion models,” in *Proceedings of the IEEE/CVF international conference on computer vision*, 2023, pp. 3836–3847.
- [27] Edward J Hu, yelong shen, Phillip Wallis, Zeyuan Allen-Zhu, Yuanzhi Li, Shean Wang, Lu Wang, and Weizhu Chen, “LoRA: Low-rank adaptation of large language models,” in *International Conference on Learning Representations*, 2022.
- [28] Yochai Blau and Tomer Michaeli, “The perception-distortion tradeoff,” in *Proceedings of the IEEE conference on computer vision and pattern recognition*, 2018, pp. 6228–6237.
- [29] Mauricio Delbracio and Peyman Milanfar, “Inversion by direct iteration: An alternative to denoising diffusion for image restoration,” *Transactions on Machine Learning Research*, 2023, Featured Certification, Outstanding Certification.
- [30] Guy Ohayon, Michael Elad, and Tomer Michaeli, “Perceptual fairness in image restoration,” *Advances in Neural Information Processing Systems*, vol. 37, pp. 70259–70312, 2024.
- [31] Guy Ohayon, Tomer Michaeli, and Michael Elad, “Posterior-mean rectified flow: Towards minimum mse photo-realistic image restoration,” *arXiv preprint arXiv:2410.00418*, 2024.
- [32] Guy Ohayon, Tomer Michaeli, and Michael Elad, “The perception-robustness tradeoff in deterministic image restoration,” in *Forty-first International Conference on Machine Learning*, 2024.
- [33] Rongyuan Wu, Tao Yang, Lingchen Sun, Zhengqiang Zhang, Shuai Li, and Lei Zhang, “Seesr: Towards semantics-aware real-world image super-resolution,” in *Proceedings of the IEEE/CVF conference on computer vision and pattern recognition*, 2024, pp. 25456–25467.
- [34] Sean Man, Guy Ohayon, Ron Raphaeli, and Michael Elad, “Proxies for distortion and consistency with applications for real-world image restoration,” *arXiv preprint arXiv:2501.12102*, 2025.
- [35] Murray Rosenblatt, “Remarks on Some Nonparametric Estimates of a Density Function,” *The Annals of Mathematical Statistics*, vol. 27, no. 3, pp. 832 – 837, 1956.
- [36] Emanuel Parzen, “On Estimation of a Probability Density Function and Mode,” *The Annals of Mathematical Statistics*, vol. 33, no. 3, pp. 1065 – 1076, 1962.
- [37] Patrick Esser, Robin Rombach, and Bjorn Ommer, “Taming transformers for high-resolution image synthesis,” in *Proceedings of the IEEE/CVF conference on computer vision and pattern recognition*, 2021, pp. 12873–12883.
- [38] Jiaming Song, Chenlin Meng, and Stefano Ermon, “Denoising diffusion implicit models,” *arXiv preprint arXiv:2010.02502*, 2020.
- [39] Chi-Wei Hsiao, Yu-Lun Liu, Cheng-Kun Yang, Sheng-Po Kuo, Kevin Jou, and Chia-Ping Chen, “Ref-ldm: A latent diffusion model for reference-based face image restoration,” *Advances in Neural Information Processing Systems*, vol. 37, pp. 74840–74867, 2024.

- [40] Hyungjin Chung, Jeongsol Kim, Michael Thompson Mccann, Marc Louis Klasky, and Jong Chul Ye, “Diffusion posterior sampling for general noisy inverse problems,” in *International Conference on Learning Representations*, 2023.
- [41] Yang Song, Liyue Shen, Lei Xing, and Stefano Ermon, “Solving inverse problems in medical imaging with score-based generative models,” in *International Conference on Learning Representations*, 2022.
- [42] Yinhuai Wang, Jiwen Yu, and Jian Zhang, “Zero-shot image restoration using denoising diffusion null-space model,” in *The Eleventh International Conference on Learning Representations*, 2023.
- [43] Yuanzhi Zhu, Kai Zhang, Jingyun Liang, Jiezhang Cao, Bihan Wen, Radu Timofte, and Luc Van Gool, “Denoising diffusion models for plug-and-play image restoration,” in *Proceedings of the IEEE/CVF Conference on Computer Vision and Pattern Recognition*, 2023, pp. 1219–1229.
- [44] Yuyang Hu, Albert Peng, Weijie Gan, Peyman Milanfar, Mauricio Delbracio, and Ulugbek S Kamilov, “Stochastic deep restoration priors for imaging inverse problems,” *arXiv preprint arXiv:2410.02057*, 2024.
- [45] Kangfu Mei, Zhengzhong Tu, Mauricio Delbracio, Hossein Talebi, Vishal M Patel, and Peyman Milanfar, “Bigger is not always better: Scaling properties of latent diffusion models,” *Transactions on Machine Learning Research*, 2024.
- [46] Nanye Ma, Shangyuan Tong, Haolin Jia, Hexiang Hu, Yu-Chuan Su, Mingda Zhang, Xuan Yang, Yandong Li, Tommi Jaakkola, Xuhui Jia, et al., “Inference-time scaling for diffusion models beyond scaling denoising steps,” *arXiv preprint arXiv:2501.09732*, 2025.
- [47] Raghav Singhal, Zachary Horvitz, Ryan Teehan, Mengye Ren, Zhou Yu, Kathleen McKeown, and Rajesh Ranganath, “A general framework for inference-time scaling and steering of diffusion models,” *arXiv preprint arXiv:2501.06848*, 2025.
- [48] Idan Achituve, Hai Victor Habi, Amir Rosenfeld, Arnon Netzer, Idit Diamant, and Ethan Fetaya, “Inverse problem sampling in latent space using sequential monte carlo,” *arXiv preprint arXiv:2502.05908*, 2025.
- [49] Luhuan Wu, Brian Trippe, Christian Naesseth, David Blei, and John P Cunningham, “Practical and asymptotically exact conditional sampling in diffusion models,” *Advances in Neural Information Processing Systems*, vol. 36, pp. 31372–31403, 2023.
- [50] Amir Nazemi, Mohammad Hadi Sepanj, Nicholas Pellegrino, Chris Czarnecki, and Paul Fieguth, “Particle-filtering-based latent diffusion for inverse problems,” *arXiv preprint arXiv:2408.13868*, 2024.
- [51] Zehao Dou and Yang Song, “Diffusion posterior sampling for linear inverse problem solving: A filtering perspective,” in *The Twelfth International Conference on Learning Representations*, 2024.
- [52] Keinosuke Fukunaga and Larry Hostetler, “The estimation of the gradient of a density function, with applications in pattern recognition,” *IEEE Transactions on information theory*, vol. 21, no. 1, pp. 32–40, 1975.
- [53] Yizong Cheng, “Mean shift, mode seeking, and clustering,” *IEEE transactions on pattern analysis and machine intelligence*, vol. 17, no. 8, pp. 790–799, 1995.
- [54] Cheng Lu, Yuhao Zhou, Fan Bao, Jianfei Chen, Chongxuan Li, and Jun Zhu, “Dpm-solver: A fast ode solver for diffusion probabilistic model sampling in around 10 steps,” *Advances in Neural Information Processing Systems*, vol. 35, pp. 5775–5787, 2022.
- [55] Eirikur Agustsson and Radu Timofte, “NTIRE 2017 challenge on single image super-resolution: Dataset and study,” in *2017 IEEE Conference on Computer Vision and Pattern Recognition Workshops, CVPR Workshops 2017, Honolulu, HI, USA, July 21-26, 2017*, 2017, pp. 1122–1131, IEEE Computer Society.
- [56] Jianrui Cai, Hui Zeng, Hongwei Yong, Zisheng Cao, and Lei Zhang, “Toward real-world single image super-resolution: A new benchmark and a new model,” in *Proceedings of the IEEE/CVF international conference on computer vision*, 2019, pp. 3086–3095.
- [57] Pengxu Wei, Ziwei Xie, Hannan Lu, Zongyuan Zhan, Qixiang Ye, Wangmeng Zuo, and Liang Lin, “Component divide-and-conquer for real-world image super-resolution,” in *Computer Vision—ECCV 2020: 16th European Conference, Glasgow, UK, August 23–28, 2020, Proceedings, Part VIII 16*. Springer, 2020, pp. 101–117.
- [58] Zhou Wang, Alan C Bovik, Hamid R Sheikh, and Eero P Simoncelli, “Image quality assessment: from error visibility to structural similarity,” *IEEE transactions on image processing*, vol. 13, no. 4, pp. 600–612, 2004.

- 422 [59] Richard Zhang, Phillip Isola, Alexei A Efros, Eli Shechtman, and Oliver Wang, “The unreasonable  
423 effectiveness of deep features as a perceptual metric,” in *Proceedings of the IEEE conference on computer  
424 vision and pattern recognition*, 2018, pp. 586–595.
- 425 [60] Martin Heusel, Hubert Ramsauer, Thomas Unterthiner, Bernhard Nessler, and Sepp Hochreiter, “Gans  
426 trained by a two time-scale update rule converge to a local nash equilibrium,” *Advances in neural  
427 information processing systems*, vol. 30, 2017.
- 428 [61] Hossein Talebi and Peyman Milanfar, “Nima: Neural image assessment,” *IEEE transactions on image  
429 processing*, vol. 27, no. 8, pp. 3998–4011, 2018.
- 430 [62] Sidi Yang, Tianhe Wu, Shuwei Shi, Shanshan Lao, Yuan Gong, Mingdeng Cao, Jiahao Wang, and Yujiu  
431 Yang, “Maniqa: Multi-dimension attention network for no-reference image quality assessment,” in  
432 *Proceedings of the IEEE/CVF conference on computer vision and pattern recognition*, 2022, pp. 1191–  
433 1200.
- 434 [63] Jianyi Wang, Kelvin CK Chan, and Chen Change Loy, “Exploring clip for assessing the look and feel of  
435 images,” in *Proceedings of the AAAI conference on artificial intelligence*, 2023, pp. 2555–2563.
- 436 [64] Weixia Zhang, Guangtao Zhai, Ying Wei, Xiaokang Yang, and Kede Ma, “Blind image quality assessment  
437 via vision-language correspondence: A multitask learning perspective,” in *Proceedings of the IEEE/CVF  
438 conference on computer vision and pattern recognition*, 2023, pp. 14071–14081.
- 439 [65] Xintao Wang, Liangbin Xie, Chao Dong, and Ying Shan, “Real-esrgan: Training real-world blind  
440 super-resolution with pure synthetic data,” in *ICCV*, 2021, pp. 1905–1914.
- 441 [66] Cheng Lu, Yuhao Zhou, Fan Bao, Jianfei Chen, Chongxuan Li, and Jun Zhu, “DPM-solver++: Fast solver  
442 for guided sampling of diffusion probabilistic models,” 2023.

## A Supplementary Material

This supplementary material provides further details to the main paper. It covers the following aspects:

- **Section A.1: Experiment Details for Real-world Image Super-Resolution:** Including dataset descriptions, backbone model configurations, an in-depth discussion of the patch-wise KDS mechanism with ablation studies, interaction of KDS with various diffusion samplers (DDIM, DPM-Solver++), and additional comparative results on severe degradation datasets.
- **Section A.2: Experiment Details for Image Inpainting:** Covering the datasets used and the hyperparameter settings for the inpainting task.
- **Section A.3: Additional Visual Results:** Presenting more qualitative examples for both super-resolution and image inpainting tasks to further demonstrate the efficacy of KDS.

### A.1 Experiment details: Real-world Image Super Resolution

#### A.1.1 Datasets

Our real-world image super-resolution experiments utilized a synthesized dataset derived from DIV2K [55], alongside two real-world datasets: RealSR [56] and DRealSR [57]. For the DIV2K-based synthesized data, we used the same dataset provided by StableSR [11], which consists of 3,000 randomly cropped patches (resolution:  $512 \times 512$  each) from the DIV2K validation set [55]. Subsequently, we generated corresponding low-resolution (LR) images (resolution:  $128 \times 128$ ) using the degradation model adopted in Real-ESRGAN [65]. For the RealSR [56] and DRealSR [57] datasets, we adhered to the protocol from [11] to center-crop the provided LR images to  $128 \times 128$ .

#### A.1.2 Backbone Model Configurations

To assess the effectiveness of our proposed KDS method, we applied it to three established backbone models: LDM-SR [24], DiffBIR [4], and SeeSR [33]. For LDM-SR, the LR image was directly employed as a conditional input, concatenated with the LDM’s primary input. For DiffBIR [4] and SeeSR [33], we adopted the hyperparameter settings recommended on their official GitHub pages. This included their specified parameters for text prompting, classifier-free guidance, and the use of their official pre-trained model checkpoints.

#### A.1.3 Patch-wise KDS Mechanism: Configuration and Discussion

As introduced in Section 3.1, we employ a patch-wise mechanism to facilitate mode-seeking within the high-dimensional latent space. The motivation is that the accuracy of the mode-seeking process is intrinsically linked to both the number of samples available for kernel density estimation (KDE) and the dimensionality of these samples. In our case, direct mode-seeking on the entire  $64 \times 64 \times 8$  latent vector  $z$  (which encodes features for the  $512 \times 512 \times 3$  image space) is impractical with a practical number of particles (e.g., 10-20).

**Patch Size Configuration:** To effectively implement our patch-wise strategy, the patch size is chosen to balance accurate mode-seeking with computational efficiency. Accurate mode-seeking across the entire latent space would necessitate thousands of samples, which is impractical for real-world applications. Therefore, to achieve robust estimation with minimal samples, we set the patch size to  $1 \times 1$ . This processes each spatial location  $(h, w)$  in the latent map as an individual 8-dimensional vector (i.e., batches of  $1 \times 1 \times 8$  vectors). This strategic choice significantly reduces the dimensionality for each kernel density estimation (KDE), enabling accurate estimation with limited samples while leveraging the rich, learned features of the 8 channels. Consequently, this facilitates more effective mode-seeking with a limited particle count. Ablation studies (Table 5) demonstrate that with a restricted particle count ( $N = 10$ ), larger patch sizes lead to inaccurate mode-seeking and sub-optimal performance.

**Steering Strength  $\delta_t$  Configuration:** Another key hyperparameter in KDS is the steering strength, denoted as  $\delta_t$ . During the diffusion process, the sampling procedure exhibits varying sensitivity to guidance. Specifically, at later stages of the sampling process (i.e., smaller  $t$  values, approaching



Table 5: Ablation Study on Patch-size ( $N = 10$ )

|                       | PSNR  | SSIM  | LPIPS ↓ | FID   |
|-----------------------|-------|-------|---------|-------|
| DDIM                  | 22.05 | 0.531 | 0.307   | 20.89 |
| + KDS (patch-size=1)  | 22.52 | 0.555 | 0.289   | 20.33 |
| + KDS (patch-size=4)  | 22.35 | 0.547 | 0.296   | 20.77 |
| + KDS (patch-size=16) | 22.17 | 0.538 | 0.304   | 20.86 |

the data), the model can be more sensitive. To ensure stability and effective guidance, we define  $\delta_t$  conditionally based on the timestep  $t$ . Assuming  $T$  is the total number of diffusion steps, we set:

$$\delta_t = \begin{cases} 0 & \text{if } t/T < 0.3 \\ 0.3 & \text{if } t/T \geq 0.3 \end{cases} \quad (10)$$

Note that, this hyperparameter setting is fixed for all the experiments across different applications and backbones.

#### 496 A.1.4 Integration with Standard Diffusion Samplers

497 As discussed in the main paper, KDS is a flexible, plug and play approach that can be applied to  
 498 all existing samplers. In this section, we will detailed introduce how to apply KDS to DDIM, and  
 499 DPM-solver and how to interatve with Classifier-Free Guidance.

500 **Interaction with DDIM:** To better illustrate the plug-and-play nature of KDS, we provide pseu-  
 501 docode for three scenarios:

- 502 1. **Algorithm 1:** Standard DDIM sampling.
- 503 2. **Algorithm 2:** DDIM integrated with KDS.
- 504 3. **Algorithm 3:** DDIM combined with Classifier-Free Guidance (CFG) and KDS.

505 As demonstrated in the pseudocode, KDS functions as a straightforward plug-in module (Line 5 - 15  
 506 in Algorithm 2). It enhances the predicted ensemble  $\hat{\mathbf{z}}_{0|t}^{\text{pred}}$  and maintain the rest sampling design of  
 507 the base sampler.

508 **Interaction with Classifier-Free Guidance (CFG):** CFG is frequently used in conditional diffusion  
 509 models for SR (like DiffBIR [4], SeeSR [33]) to further improve perceptual quality. CFG is applied  
 510 by adjusting the noise prediction, commonly via the extrapolation formula

$$\tilde{\epsilon}(\mathbf{z}_t, t, \mathbf{c}) = \epsilon(\mathbf{z}_t, t, \emptyset) + w(\epsilon(\mathbf{z}_t, t, \mathbf{c}) - \epsilon(\mathbf{z}_t, t, \emptyset)), \quad (11)$$

511 where  $w$  is the guidance scale. While higher  $w$  can enhance perception, it sometimes introduces  
 512 artifacts. We investigated how KDS interacts with CFG by varying  $w$  in the DiffBIR model using  
 513 DDIM sampling on the DrealSR dataset. As shown in Table 6, KDS consistently boosts performance  
 514 across different CFG strengths ( $w = 1, 2, 4$ ). For each value of  $w$ , adding KDS leads to substantial  
 515 improvements in PSNR and SSIM, along with generally better perceptual metrics (LPIPS, NIMA,  
 516 CLIPQA). This suggests that KDS provides benefits complementary to CFG, enhancing fidelity  
 517 without hindering the perceptual adjustments offered by CFG.

Table 6: Performance of DDIM with Varying CFG Weights  $w$  on DrealSR Dataset.

| Method             | PSNR         | SSIM         | LPIPS (↓)    | DISTS(↓)     |
|--------------------|--------------|--------------|--------------|--------------|
| DDIM ( $w = 1$ )   | 25.11        | 0.576        | 0.492        | 0.298        |
| + KDS ( $N = 10$ ) | <b>26.94</b> | <b>0.677</b> | <b>0.427</b> | <b>0.283</b> |
| DDIM ( $w = 2$ )   | 24.75        | 0.569        | 0.486        | 0.293        |
| + KDS ( $N = 10$ ) | <b>26.60</b> | <b>0.667</b> | <b>0.428</b> | <b>0.278</b> |
| DDIM ( $w = 4$ )   | 23.99        | 0.551        | 0.491        | 0.293        |
| + KDS ( $N = 10$ ) | <b>25.63</b> | <b>0.645</b> | <b>0.422</b> | <b>0.276</b> |
| DDIM ( $w = 6$ )   | 23.27        | 0.534        | 0.497        | 0.296        |
| + KDS ( $N = 10$ ) | <b>25.04</b> | <b>0.629</b> | <b>0.440</b> | <b>0.282</b> |

---

#### Algorithm 1 Standard DDIM Sampling

---

**Require:** Model  $\epsilon_\theta$ , condition:  $\mathbf{c}$ , Schedule  $\bar{\alpha}_t$

- 1:  $\mathbf{z}_T \sim \mathcal{N}(0, \mathbf{I})$  ▷ Init noise
  - 2: **for**  $t = T, \dots, 1$  **do**
  - 3:    $\epsilon_{\theta,t} \leftarrow \epsilon_\theta(\mathbf{z}_t, t, \mathbf{c})$  ▷ Predict noise
  - 4:    $\hat{\mathbf{z}}_{0|t} \leftarrow (\mathbf{z}_t - \sqrt{1 - \bar{\alpha}_t} \epsilon_{\theta,t}) / \sqrt{\bar{\alpha}_t}$  ▷ Predict  $\mathbf{z}_0$
  - 5:    $\epsilon'_t \leftarrow (\mathbf{z}_t - \sqrt{\bar{\alpha}_t} \hat{\mathbf{z}}_{0|t}) / \sqrt{1 - \bar{\alpha}_t}$  ▷ Update direction based on  $\hat{\mathbf{z}}_{0|t}$
  - 6:    $\mathbf{z}_{t-1} \leftarrow \sqrt{\bar{\alpha}_{t-1}} \hat{\mathbf{z}}_{0|t} + \sqrt{1 - \bar{\alpha}_{t-1}} \epsilon'_t$  ▷ DDIM step
  - 7: **end for**
  - 8: **return**  $\mathbf{z}_0$
-

---

**Algorithm 2** DDIM + KDS

---

**Require:** Model  $\epsilon_\theta$ , Schedule  $\bar{\alpha}_t$ , condition:  $\mathbf{c}$ , Number of particles:  $N$ , bandwidth:  $h$ , steering strength:  $\delta_t$ , PatchSize

- 1:  $\mathbf{Z}_T \sim \mathcal{N}(0, \mathbf{I})$  (ensemble of  $N$  samples) ▷ Init noise ensemble
- 2: **for**  $t = T, \dots, 1$  **do**
- 3:    $\mathbf{E}_{\theta,t} \leftarrow \epsilon_\theta(\mathbf{Z}_t, t, \mathbf{c})$  ▷ Predict ensemble noise
- 4:    $\hat{\mathbf{Z}}_{0|t}^{\text{pred}} \leftarrow (\mathbf{Z}_t - \sqrt{1 - \bar{\alpha}_t} \mathbf{E}_{\theta,t}) / \sqrt{\bar{\alpha}_t}$  ▷ Predict  $\mathbf{x}_0$  ensemble
- 5:    $\mathbf{Patches} \leftarrow \text{Patchify}(\hat{\mathbf{Z}}_{0|t}^{\text{pred}})$  ▷ Extract all non-overlapped patches:  $\mathbf{Patches}[k, loc]$ .
- 6:   **for** each patch location  $j$  **do** ▷ This loop over patch locations, can be executed **in parallel**.
- 7:      $\mathbf{P}_j \leftarrow \mathbf{Patches}[:, j]$  ▷ Ensemble of  $N$  original patches at location  $j$ .
- 8:     **for**  $i = 1, \dots, N$  **do** ▷ For particle  $i$ 's patch at location  $j$ , can be computed **in parallel**.
- 9:        $\mathbf{p}_j^{(i)} \leftarrow \mathbf{P}_j[i]$  ▷ Patch from particle  $i$  at location  $j$ .
- 10:        $\mathbf{m}(\mathbf{p}_j^{(i)}) \leftarrow \frac{\sum_{k=1}^N G\left(\frac{\|\mathbf{p}_j^{(i)} - \mathbf{p}_j^{(k)}\|^2}{h^2}\right) \mathbf{p}_j^{(k)}}{\sum_{k=1}^N G\left(\frac{\|\mathbf{p}_j^{(i)} - \mathbf{p}_j^{(k)}\|^2}{h^2}\right)} - \mathbf{p}_j^{(i)}$  ▷ Mean shift vector (Eq. 7).
- 11:        $\hat{\mathbf{p}}_j^{(i), \text{KDS}} \leftarrow \mathbf{p}_j^{(i)} + \delta_t \mathbf{m}(\mathbf{p}_j^{(i)})$  ▷ Apply steering (Eq. 8)
- 12:        $\mathbf{Patches}[i, j] \leftarrow \hat{\mathbf{p}}_j^{(i), \text{KDS}}$  ▷ Update the patch set with the guided patch.
- 13:   **end for**
- 14: **end for**
- 15:    $\hat{\mathbf{Z}}_{0|t}^{\text{KDS}} \leftarrow \text{Unpatchify}(\mathbf{Patches})$  ▷ Reconstruct guided latent prediction.
- 16:    $\mathbf{E}'_t \leftarrow (\mathbf{Z}_t - \sqrt{\bar{\alpha}_t} \hat{\mathbf{Z}}_{0|t}^{\text{KDS}}) / \sqrt{1 - \bar{\alpha}_t}$  ▷ Update direction
- 17:    $\mathbf{Z}_{t-1} \leftarrow \sqrt{\bar{\alpha}_{t-1}} \hat{\mathbf{Z}}_{0|t}^{\text{KDS}} + \sqrt{1 - \bar{\alpha}_{t-1}} \mathbf{E}'_t$  ▷ DDIM step
- 18: **end for**
- 19: **return**  $\hat{\mathbf{Z}}_0^{\text{KDS}}$  ▷ Return KDS-guided result

---

---

**Algorithm 3** DDIM + CFG + KDS

---

**Require:** Model  $\epsilon_\theta$ , Schedule  $\bar{\alpha}_t$ , condition:  $\mathbf{c}$ , Number of particles:  $N$ , bandwidth:  $h$ , steering strength:  $\delta_t$ , CFG strength:  $w$ , PatchSize

- 1:  $\mathbf{Z}_T \sim \mathcal{N}(0, \mathbf{I})$  (ensemble of  $N$  samples) ▷ Init noise ensemble
- 2: **for**  $t = T, \dots, 1$  **do**
- 3:    $\mathbf{E}_{\theta,t} \leftarrow \epsilon_\theta(\mathbf{Z}_t, t, \emptyset) + w(\epsilon_\theta(\mathbf{Z}_t, t, \mathbf{c}) - \epsilon_\theta(\mathbf{Z}_t, t, \emptyset))$  ▷ Predict ensemble noise with CFG
- 4:    $\hat{\mathbf{Z}}_{0|t}^{\text{pred}} \leftarrow (\mathbf{Z}_t - \sqrt{1 - \bar{\alpha}_t} \mathbf{E}_{\theta,t}) / \sqrt{\bar{\alpha}_t}$  ▷ Predict  $\mathbf{x}_0$  ensemble
- 5:    $\hat{\mathbf{Z}}_{0|t}^{\text{KDS}} \leftarrow \text{Patch-wise KDS}(\hat{\mathbf{Z}}_{0|t}^{\text{pred}})$  ▷ Same as Step 5-15 in Algorithm 2
- 6:    $\mathbf{E}'_t \leftarrow (\mathbf{Z}_t - \sqrt{\bar{\alpha}_t} \hat{\mathbf{Z}}_{0|t}^{\text{KDS}}) / \sqrt{1 - \bar{\alpha}_t}$  ▷ Update direction based on KDS-guided  $\mathbf{x}_0$
- 7:    $\mathbf{Z}_{t-1} \leftarrow \sqrt{\bar{\alpha}_{t-1}} \hat{\mathbf{Z}}_{0|t}^{\text{KDS}} + \sqrt{1 - \bar{\alpha}_{t-1}} \mathbf{E}'_t$  ▷ DDIM step with KDS-guided  $\mathbf{x}_0$
- 8: **end for**
- 9: **return**  $\hat{\mathbf{Z}}_0^{\text{KDS}}$  ▷ Return KDS-guided result

---

---

**Algorithm 4** DPM-Solver++.

**Require:** initial value  $Z_T$ , time steps  $\{t_i\}_{i=0}^M$  and  $\{s_i\}_{i=1}^M$ , data prediction model  $Z_\theta$ .  
1:  $Z_T \sim \mathcal{N}(0, \mathbf{I})$  (ensemble of  $N$  samples)  $\triangleright$  Init noise ensemble  
2:  $\tilde{Z}_{t_0} \leftarrow Z_T$ .  
3: **for**  $i \leftarrow 1$  to  $M$  **do**  
4:  $h_i \leftarrow \lambda_{t_i} - \lambda_{t_{i-1}}$   
5:  $r_i \leftarrow \frac{\lambda_{s_i} - \lambda_{t_{i-1}}}{h_i}$   
6:  $\hat{Z}_{0|t}^{\text{pred}} \leftarrow Z_\theta(\tilde{Z}_{t_{i-1}}, t_{i-1})$   
7:  $U_i \leftarrow \frac{\sigma_{s_i}}{\sigma_{t_{i-1}}} \tilde{Z}_{t_{i-1}} - \alpha_{s_i} (e^{-r_i h_i} - 1) \hat{Z}_{0|t}^{\text{pred}}$   
8:  $\hat{U}_{0|s}^{\text{pred}} \leftarrow Z_\theta(U_i, s_i)$   
9:  $D_i \leftarrow (1 - \frac{1}{2r_i}) \hat{Z}_{0|t}^{\text{pred}} + \frac{1}{2r_i} \hat{U}_{0|s}^{\text{pred}}$   
10:  $\tilde{Z}_{t_i} \leftarrow \frac{\sigma_{t_i}}{\sigma_{t_{i-1}}} \tilde{Z}_{t_{i-1}} - \alpha_{t_i} (e^{-h_i} - 1) D_i$   
11: **end for**  
12: **return**  $\tilde{Z}_{t_M}$

---

---

**Algorithm 5** DPM-Solver++ with KDS.

**Require:** initial value  $Z_T$ , time steps  $\{t_i\}_{i=0}^M$  and  $\{s_i\}_{i=1}^M$ , data prediction model  $Z_\theta$ .  
1:  $Z_T \sim \mathcal{N}(0, \mathbf{I})$  (ensemble of  $N$  samples)  $\triangleright$  Init noise ensemble  
2:  $\tilde{Z}_{t_0} \leftarrow Z_T$ .  
3: **for**  $i \leftarrow 1$  to  $M$  **do**  
4:  $h_i \leftarrow \lambda_{t_i} - \lambda_{t_{i-1}}$   
5:  $r_i \leftarrow \frac{\lambda_{s_i} - \lambda_{t_{i-1}}}{h_i}$   
6:  $\hat{Z}_{0|t}^{\text{pred}} \leftarrow Z_\theta(\tilde{Z}_{t_{i-1}}, t_{i-1})$   
7:  $\hat{Z}_{0|t}^{\text{KDS}} \leftarrow \text{Patch-wise KDS}(\hat{Z}_{0|t}^{\text{pred}})$   $\triangleright$  Same as Step 5-15 in Algorithm 2  
8:  $U_i \leftarrow \frac{\sigma_{s_i}}{\sigma_{t_{i-1}}} \tilde{Z}_{t_{i-1}} - \alpha_{s_i} (e^{-r_i h_i} - 1) \hat{Z}_{0|t}^{\text{KDS}}$   
9:  $\hat{U}_{0|s}^{\text{pred}} \leftarrow Z_\theta(U_i, s_i)$   
10:  $\hat{U}_{0|s}^{\text{KDS}} \leftarrow \text{Patch-wise KDS}(\hat{U}_{0|s}^{\text{pred}})$   $\triangleright$  Same as Step 5-15 in Algorithm 2  
11:  $D_i \leftarrow (1 - \frac{1}{2r_i}) \hat{Z}_{0|t}^{\text{KDS}} + \frac{1}{2r_i} \hat{U}_{0|s}^{\text{KDS}}$   
12:  $\tilde{Z}_{t_i} \leftarrow \frac{\sigma_{t_i}}{\sigma_{t_{i-1}}} \tilde{Z}_{t_{i-1}} - \alpha_{t_i} (e^{-h_i} - 1) D_i$   
13: **end for**  
14: **return**  $\tilde{Z}_{t_M}$

---

### A.1.5 Additional Comparisons on Various Degradations and Samplers

In this subsection, we further evaluate KDS’s performance on several additional real-world SR degradations and its effectiveness as a plug-in module for DPM-Solver++ [66]. We introduce a novel dataset, DF2K, generated by synthesizing 3,000 randomly degraded image pairs from the original DF2K dataset. While adopting the Real-ESRGAN pipeline, we employed hyperparameters that introduce more significant blur, noise, and JPEG artifacts, making it a more challenging benchmark compared to standard degradation levels, such as those in DIV2K. As shown in Table 7, KDS consistently improves performance on both the challenging DF2K dataset and the standard DIV2K degradation dataset.

Table 7: Performance with LDM-SR backbone on different Real-world SR degradation levels.

| Datasets     | DF2k         |              |              |              |              | DIV2k        |              |              |              |              |
|--------------|--------------|--------------|--------------|--------------|--------------|--------------|--------------|--------------|--------------|--------------|
|              | PSNR         | SSIM         | LPIPS (↓)    | NIMA         | FID (↓)      | PSNR         | SSIM         | LPIPS (↓)    | NIMA         | FID (↓)      |
| DPM-Solver++ | 23.11        | 0.579        | 0.276        | 4.968        | 18.76        | 22.06        | 0.532        | 0.306        | 4.922        | 20.88        |
| + KDS        | <b>23.70</b> | <b>0.594</b> | <b>0.265</b> | <b>4.972</b> | <b>18.38</b> | <b>22.29</b> | <b>0.542</b> | <b>0.290</b> | <b>4.947</b> | <b>20.65</b> |
| DDIM         | 22.88        | 0.542        | 0.276        | 4.930        | 18.59        | 22.05        | 0.531        | 0.307        | 4.922        | 20.89        |
| + KDS        | <b>23.71</b> | <b>0.597</b> | <b>0.261</b> | <b>4.943</b> | <b>18.11</b> | <b>22.37</b> | <b>0.549</b> | <b>0.292</b> | <b>4.949</b> | <b>20.78</b> |

### A.1.6 Additional comparison with Best-of-N approaches:

While inference-time scaling allows for generating multiple candidate solutions, particularly useful for low-quality inputs, selecting the optimal one from an N-particle ensemble remains a challenge. In our main paper, we didn’t cover the full scope of this experiment. Here, we expand on that by including more metrics. As Table 8 now demonstrates, using non-reference metrics like LIQE [64] or ClipiQA to pick the best particle from an N-selection (i.e., ”best LIQE best of N” or ”best CLIPIQA best of N”) results in significantly lower performance compared to our Kernel Density Steering (KDS) method. This shows that, despite comparable computational costs, traditional post-sampling selection methods don’t achieve the same performance level as KDS. As shown in Figure 8, KDS method achieve the most stable performance compared with both BoN baselines, which suffers from the artifacts which confused the non-reference metrics.

Table 8: Comparison of BoN Selection Methods

| Method          | PSNR         | SSIM         | LPIPS (↓)    | DISTS (↓)    | LIQE         | CLIPIQA      |
|-----------------|--------------|--------------|--------------|--------------|--------------|--------------|
| DDIM            | 23.21        | 0.610        | 0.370        | 0.250        | 4.046        | 0.689        |
| + BoN (LIQE)    | 23.72        | 0.622        | 0.361        | 0.246        | <b>4.351</b> | 0.741        |
| + BoN (CLIPIQA) | 23.01        | 0.592        | 0.382        | 0.247        | 4.187        | <b>0.774</b> |
| + KDS           | <b>24.39</b> | <b>0.669</b> | <b>0.339</b> | <b>0.245</b> | 3.819        | 0.692        |

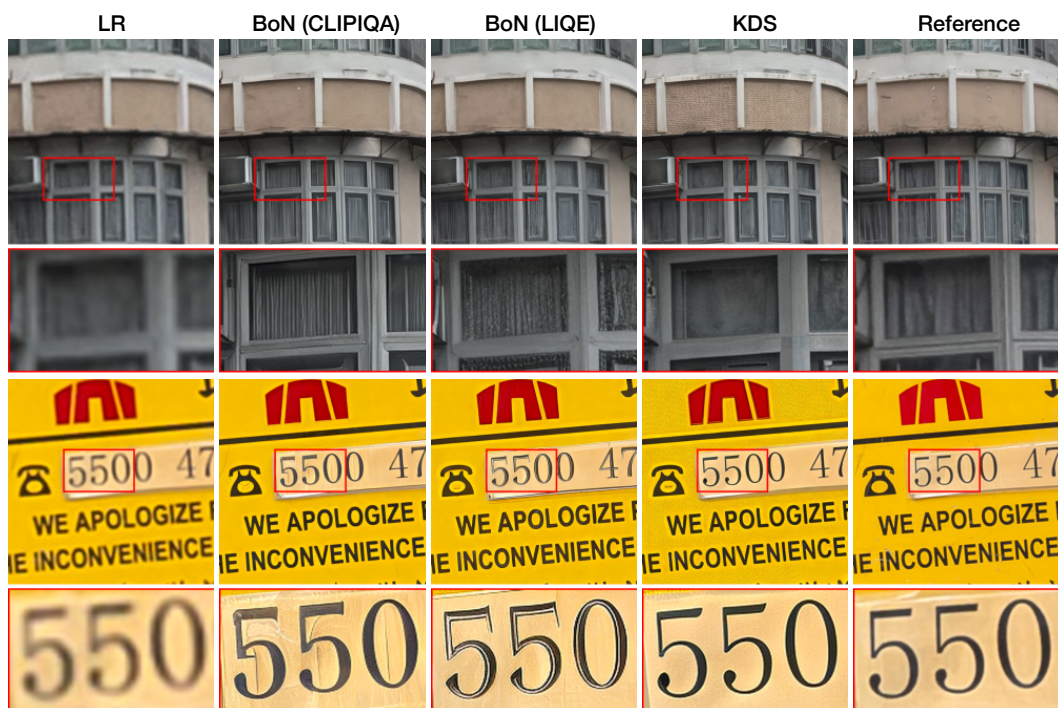

Figure 8: Visual comparison between KDS and Best-of-N (BoN) selection. BoN (CLIPQA) and BoN (LIQE) means the best particle in terms of these two metrics correspondingly.



## 538 A.2 Experiment details: Image Inpainting

539 **Datasets** We generated our inpainting test set by center corpped 30% square region of each image.  
540 We generate used first 1,000 images from ImageNet testset.

541 **Hyperparameters:** Similar to real-world SR settings, we fixed the patch size to 1, bandwidth  $h$  to  
542 0.3, steering strength  $\delta_t$  same as introduced in (Eq: 10).

## 543 A.3 Additional Visual Results

544 This section provides additional qualitative results to visually demonstrate the effectiveness of Kernel  
545 Density Steering (KDS). The figures included are:

- 546 • **Figure 9, Figure 10 and Figure 11:** These figures showcase super-resolution performance  
547 on the DIV2K dataset using LDM-SR, DiffBIR and SeeSR backbones, respectively. They  
548 illustrate improvements in sharpness and detail recovery achieved with KDS.
- 549 • **Figure 12:** This figure highlights KDS’s robustness, demonstrating its performance on the  
550 more challenging DF2K real-world SR dataset with the LDM-SR backbone.
- 551 • **Figures 13, 14, and 15:** These figures display image inpainting results on the ImageNet  
552 dataset using LDM-inpainting. Each figure presents all 10 particles sampled with standard  
553 DDIM versus DDIM enhanced with KDS. They visually confirm KDS’s ability to improve  
554 fidelity and reduce artifacts across the ensemble for the inpainted regions.

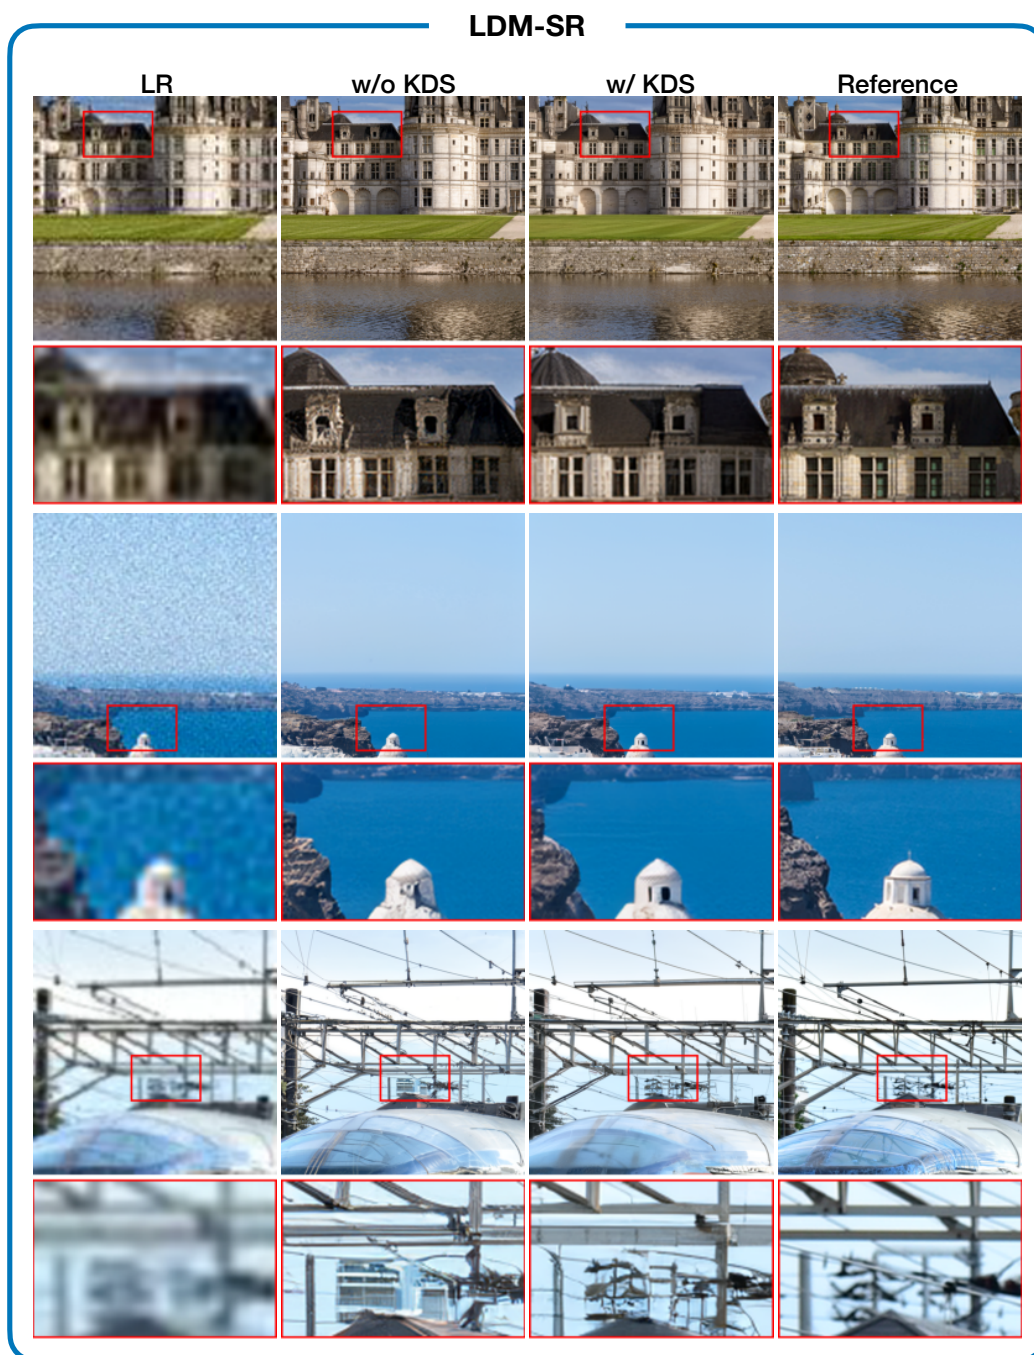

Figure 9: Real-world image super-resolution performance with LDM-SR on DIV2K dataset.

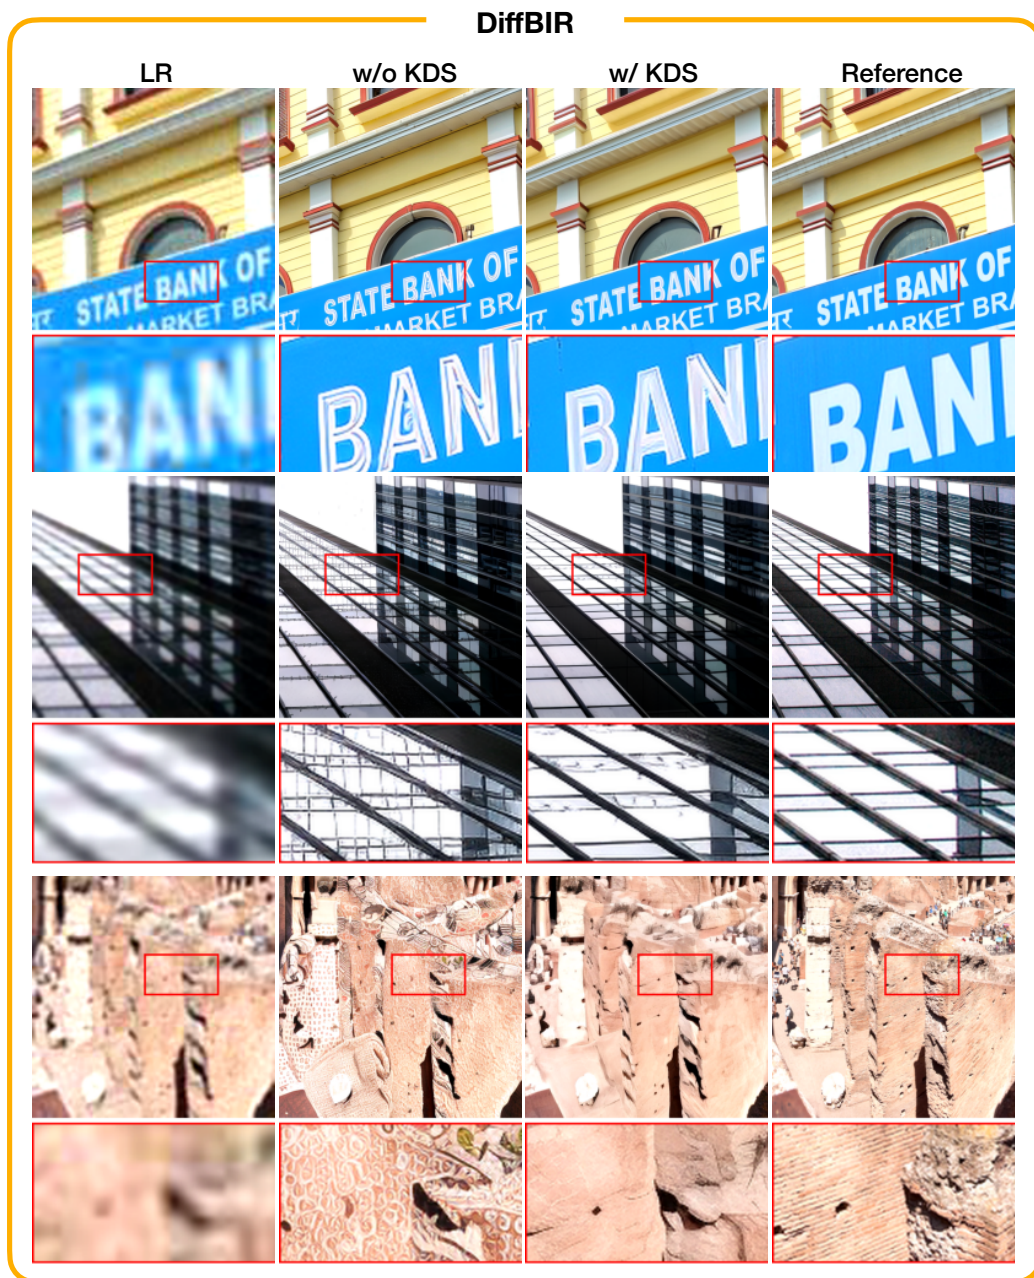

Figure 10: Real-world image super-resolution performance with DiffBIR on DIV2K dataset.



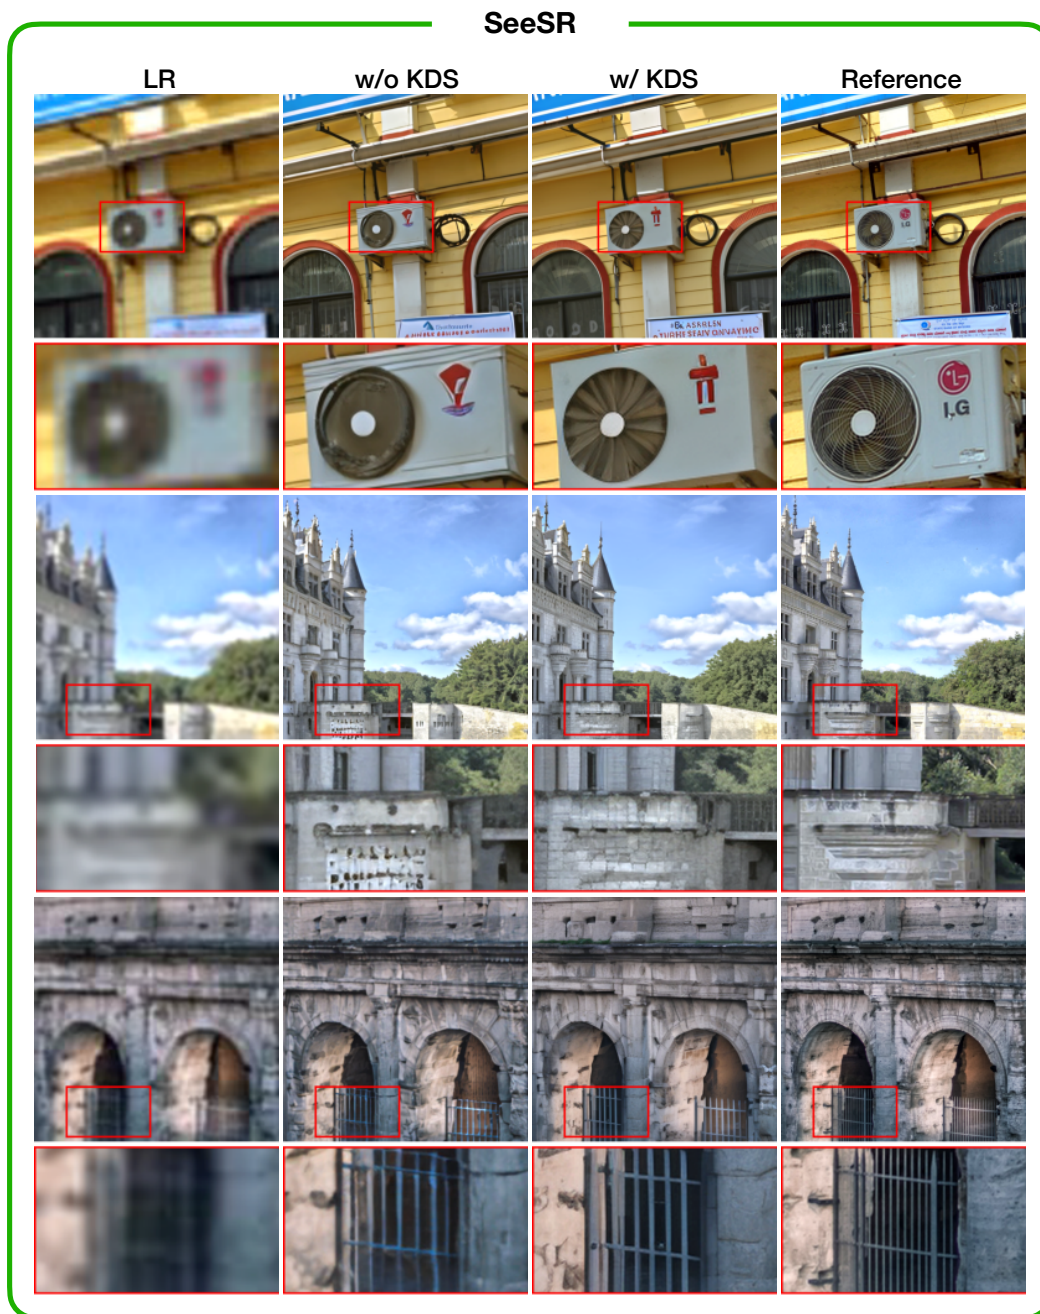

Figure 11: Real-world image super-resolution performance with SeeSR on DIV2K dataset.

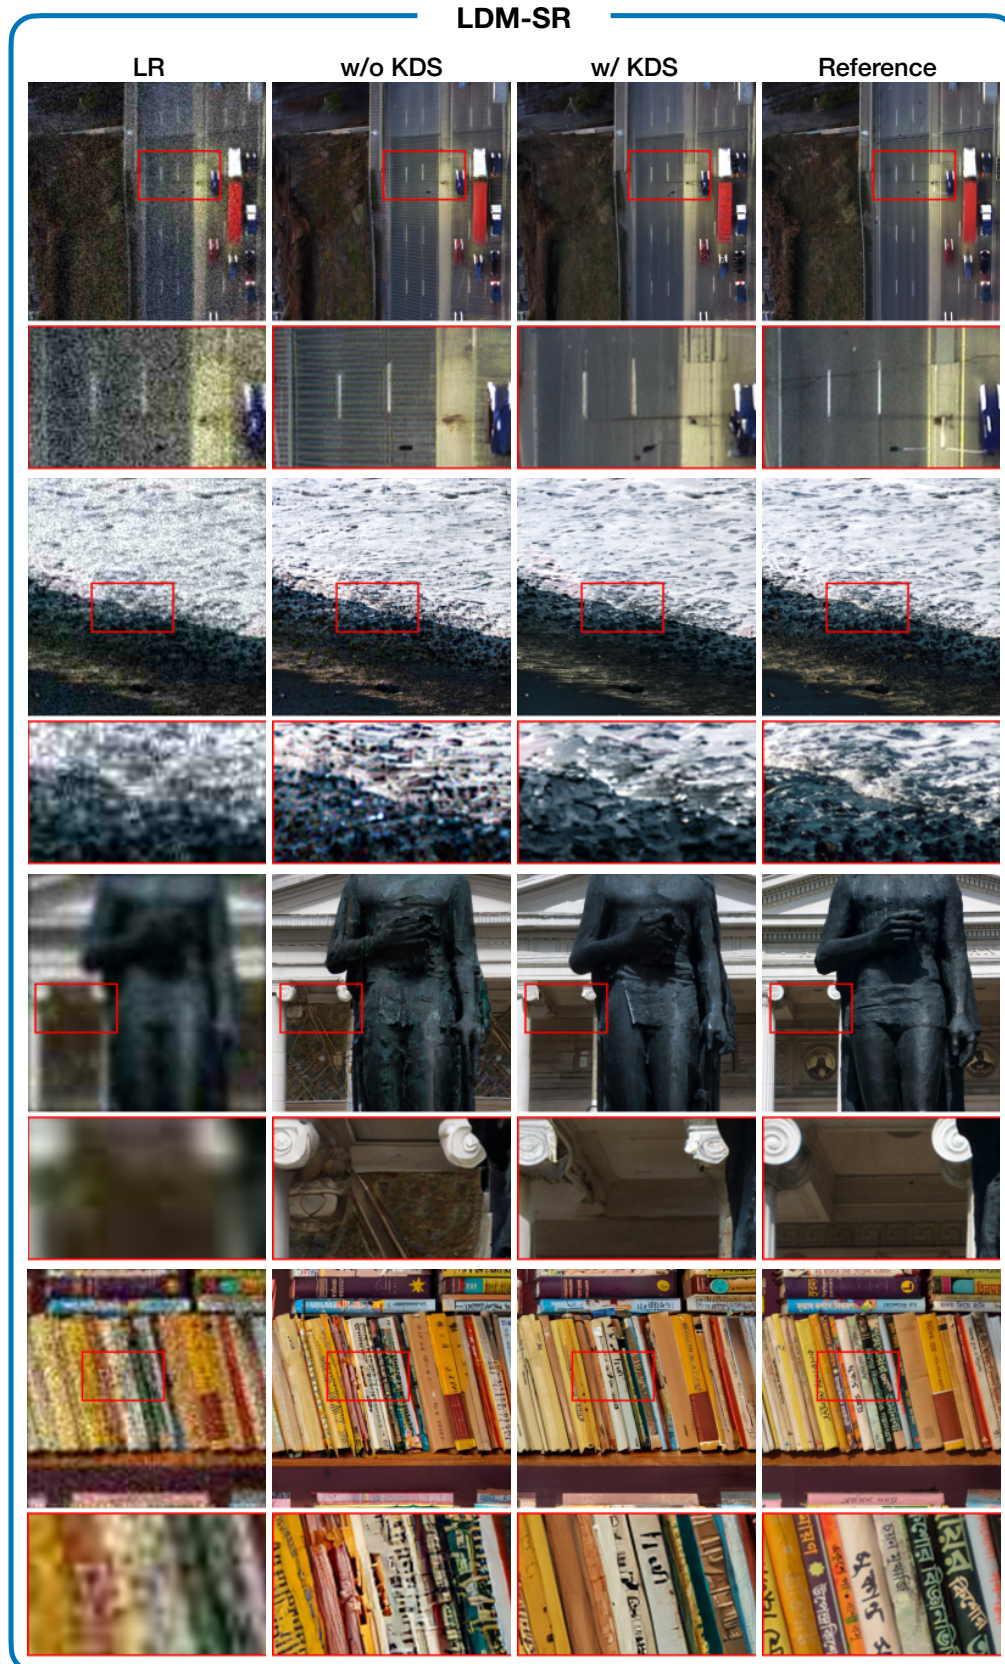

Figure 12: Real-world image super-resolution performance with LDM-SR on DF2K dataset.



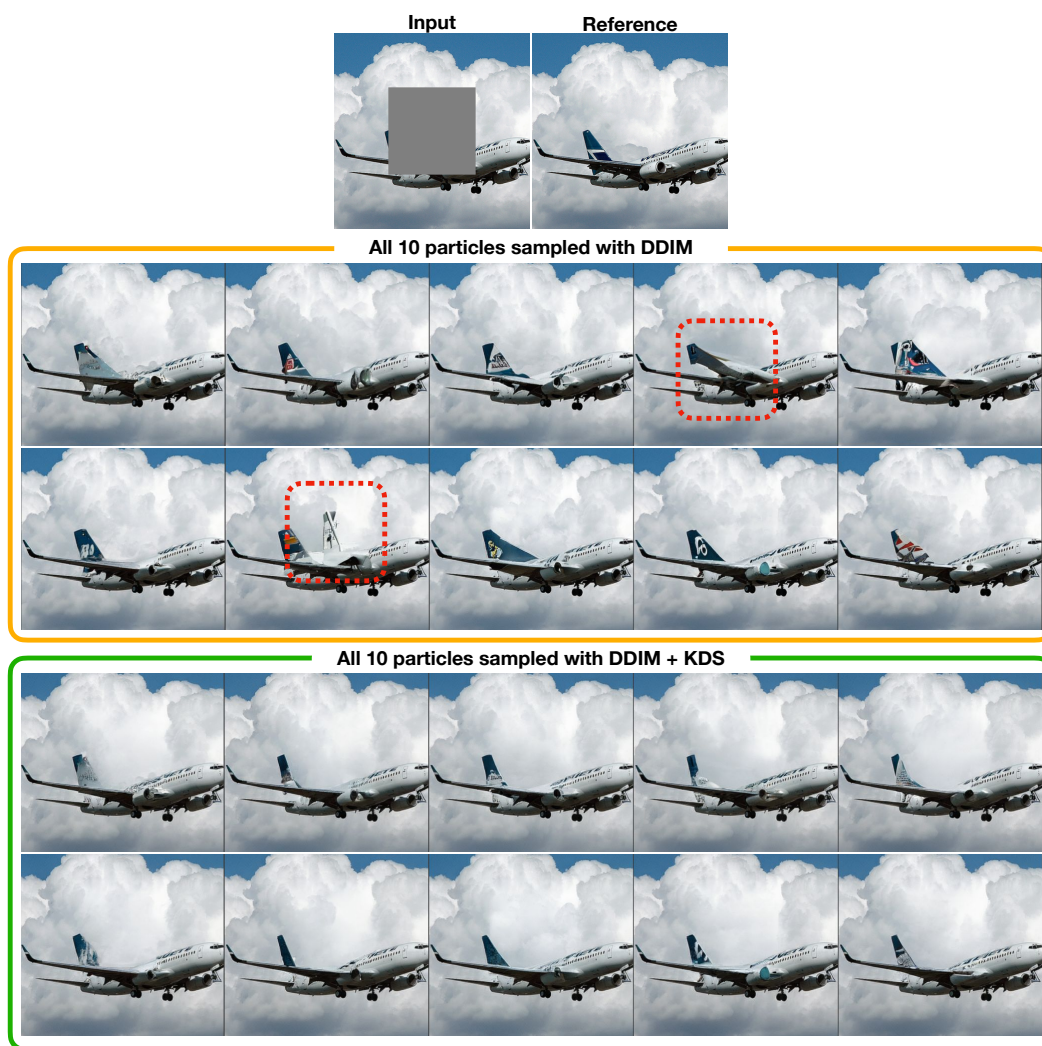

Figure 13: Image Inpainting performance with LDM-inpainting on ImageNet dataset. Visualizes all 10 particles for DDIM vs. DDIM + KDS. Regions with artifacts were highlighted with red box.



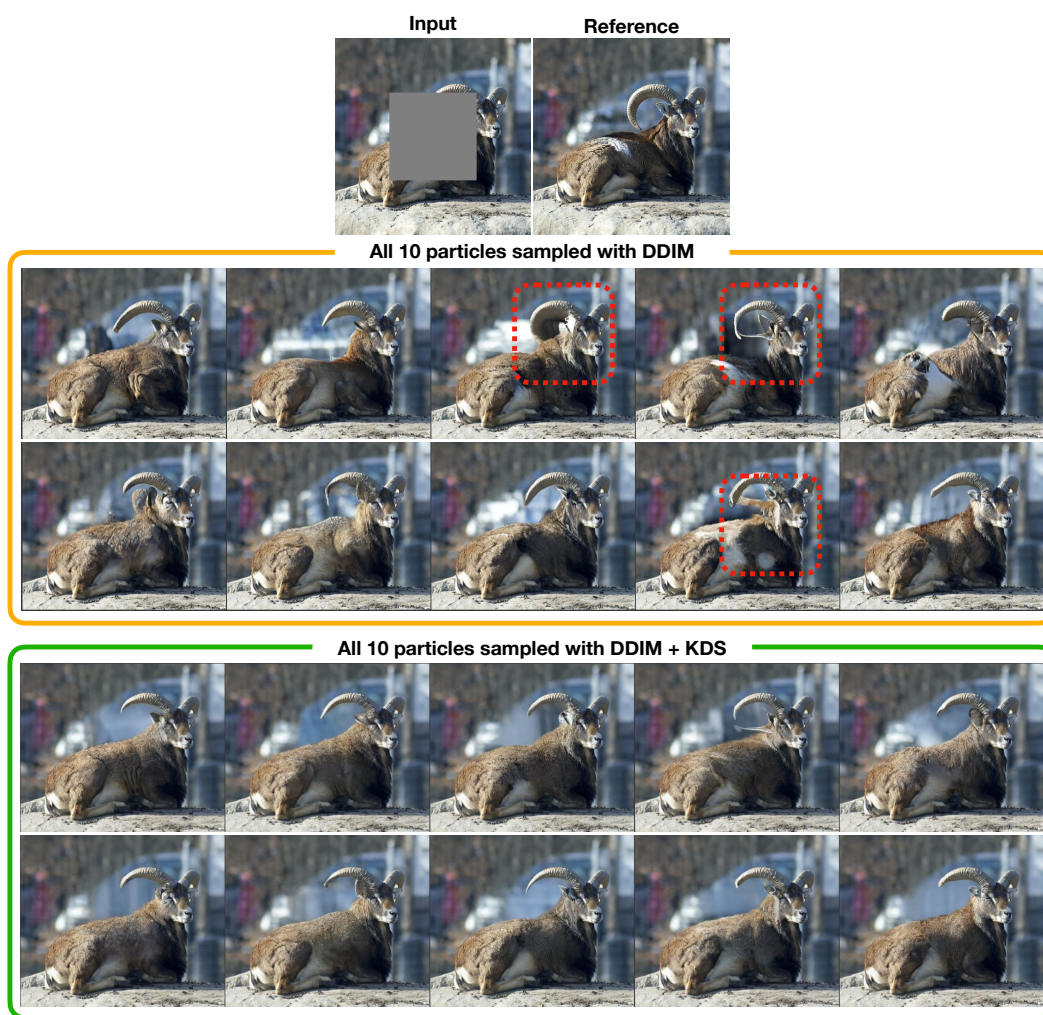

Figure 14: Image Inpainting performance with LDM-inpainting on ImageNet dataset. Visualizes all 10 particles for DDIM vs. DDIM + KDS. Regions with artifacts were highlighted with red box.

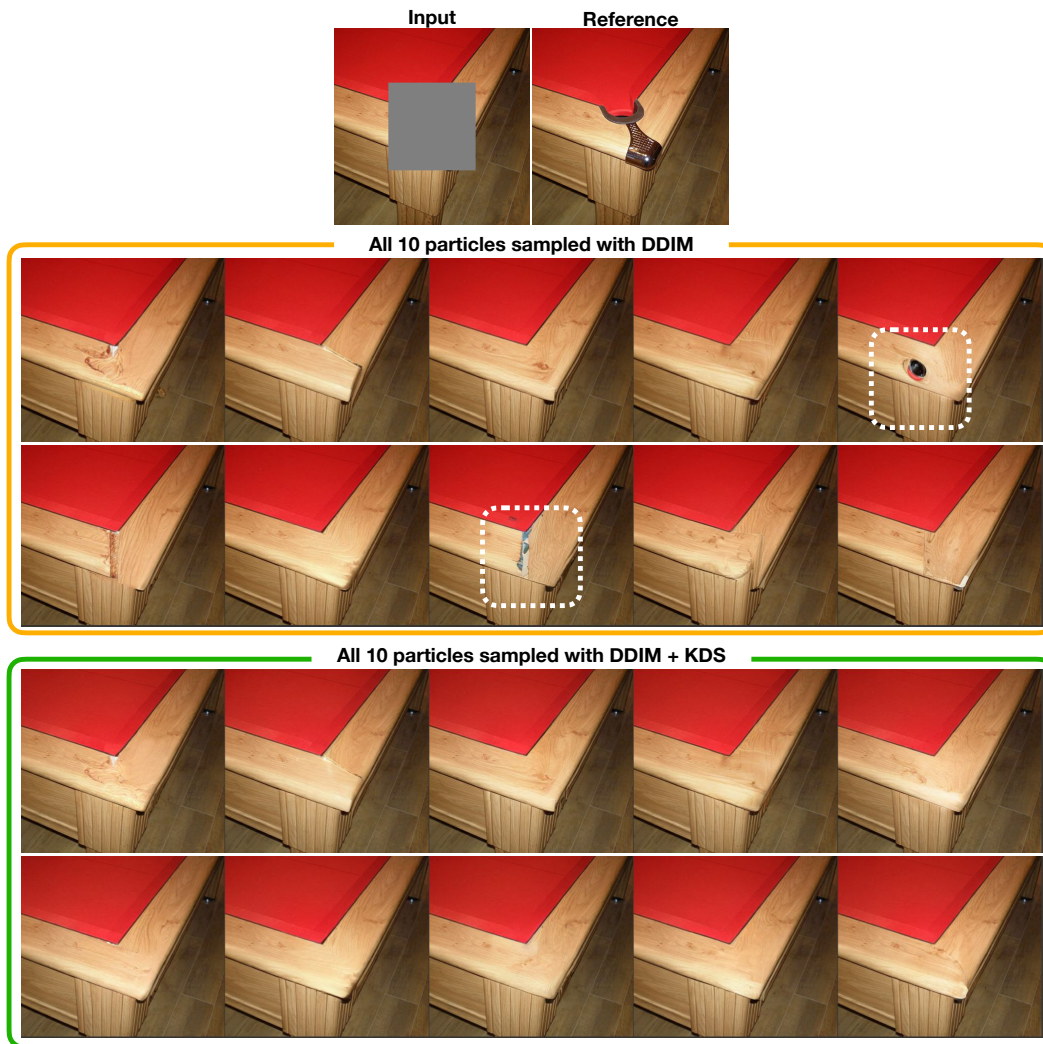

Figure 15: Image Inpainting performance with LDM-inpainting on ImageNet dataset. Visualizes all 10 particles for DDIM vs. DDIM + KDS. Regions with artifacts were highlighted with white box.

## NeurIPS Paper Checklist

The checklist is designed to encourage best practices for responsible machine learning research, addressing issues of reproducibility, transparency, research ethics, and societal impact. Do not remove the checklist: **The papers not including the checklist will be desk rejected.** The checklist should follow the references and follow the (optional) supplemental material. The checklist does NOT count towards the page limit.

Please read the checklist guidelines carefully for information on how to answer these questions. For each question in the checklist:

- You should answer [Yes] , [No] , or [NA] .
- [NA] means either that the question is Not Applicable for that particular paper or the relevant information is Not Available.
- Please provide a short (1–2 sentence) justification right after your answer (even for NA).

**The checklist answers are an integral part of your paper submission.** They are visible to the reviewers, area chairs, senior area chairs, and ethics reviewers. You will be asked to also include it (after eventual revisions) with the final version of your paper, and its final version will be published with the paper.

The reviewers of your paper will be asked to use the checklist as one of the factors in their evaluation. While "[Yes]" is generally preferable to "[No]", it is perfectly acceptable to answer "[No]" provided a proper justification is given (e.g., "error bars are not reported because it would be too computationally expensive" or "we were unable to find the license for the dataset we used"). In general, answering "[No]" or "[NA]" is not grounds for rejection. While the questions are phrased in a binary way, we acknowledge that the true answer is often more nuanced, so please just use your best judgment and write a justification to elaborate. All supporting evidence can appear either in the main paper or the supplemental material, provided in appendix. If you answer [Yes] to a question, in the justification please point to the section(s) where related material for the question can be found.

IMPORTANT, please:

- **Delete this instruction block, but keep the section heading "NeurIPS Paper Checklist",**
- **Keep the checklist subsection headings, questions/answers and guidelines below.**
- **Do not modify the questions and only use the provided macros for your answers.**

### 1. Claims

Question: Do the main claims made in the abstract and introduction accurately reflect the paper's contributions and scope?

Answer: [Yes]

Justification: The main claims made in the abstract and introduction accurately reflect our paper's contributions and scope .

Guidelines:

- The answer NA means that the abstract and introduction do not include the claims made in the paper.
- The abstract and/or introduction should clearly state the claims made, including the contributions made in the paper and important assumptions and limitations. A No or NA answer to this question will not be perceived well by the reviewers.
- The claims made should match theoretical and experimental results, and reflect how much the results can be expected to generalize to other settings.
- It is fine to include aspirational goals as motivation as long as it is clear that these goals are not attained by the paper.

### 2. Limitations

Question: Does the paper discuss the limitations of the work performed by the authors?

Answer: [Yes]

Justification: We include a specific section to discuss the limitation of this work.

Guidelines:

- The answer NA means that the paper has no limitation while the answer No means that the paper has limitations, but those are not discussed in the paper.
- The authors are encouraged to create a separate "Limitations" section in their paper.
- The paper should point out any strong assumptions and how robust the results are to violations of these assumptions (e.g., independence assumptions, noiseless settings, model well-specification, asymptotic approximations only holding locally). The authors should reflect on how these assumptions might be violated in practice and what the implications would be.
- The authors should reflect on the scope of the claims made, e.g., if the approach was only tested on a few datasets or with a few runs. In general, empirical results often depend on implicit assumptions, which should be articulated.
- The authors should reflect on the factors that influence the performance of the approach. For example, a facial recognition algorithm may perform poorly when image resolution is low or images are taken in low lighting. Or a speech-to-text system might not be used reliably to provide closed captions for online lectures because it fails to handle technical jargon.
- The authors should discuss the computational efficiency of the proposed algorithms and how they scale with dataset size.
- If applicable, the authors should discuss possible limitations of their approach to address problems of privacy and fairness.
- While the authors might fear that complete honesty about limitations might be used by reviewers as grounds for rejection, a worse outcome might be that reviewers discover limitations that aren't acknowledged in the paper. The authors should use their best judgment and recognize that individual actions in favor of transparency play an important role in developing norms that preserve the integrity of the community. Reviewers will be specifically instructed to not penalize honesty concerning limitations.

### 3. Theory assumptions and proofs

Question: For each theoretical result, does the paper provide the full set of assumptions and a complete (and correct) proof?

Answer: [NA]

Justification: We do not make theoretical claims in this work.

Guidelines:

- The answer NA means that the paper does not include theoretical results.
- All the theorems, formulas, and proofs in the paper should be numbered and cross-referenced.
- All assumptions should be clearly stated or referenced in the statement of any theorems.
- The proofs can either appear in the main paper or the supplemental material, but if they appear in the supplemental material, the authors are encouraged to provide a short proof sketch to provide intuition.
- Inversely, any informal proof provided in the core of the paper should be complemented by formal proofs provided in appendix or supplemental material.
- Theorems and Lemmas that the proof relies upon should be properly referenced.

### 4. Experimental result reproducibility

Question: Does the paper fully disclose all the information needed to reproduce the main experimental results of the paper to the extent that it affects the main claims and/or conclusions of the paper (regardless of whether the code and data are provided or not)?

Answer: [Yes]

Justification: We have included all the information to the experiment details. Due to the limitation of pages in the main paper, we moved some of them to the supplementary material.

Guidelines:



- The answer NA means that the paper does not include experiments.
- If the paper includes experiments, a No answer to this question will not be perceived well by the reviewers: Making the paper reproducible is important, regardless of whether the code and data are provided or not.
- If the contribution is a dataset and/or model, the authors should describe the steps taken to make their results reproducible or verifiable.
- Depending on the contribution, reproducibility can be accomplished in various ways. For example, if the contribution is a novel architecture, describing the architecture fully might suffice, or if the contribution is a specific model and empirical evaluation, it may be necessary to either make it possible for others to replicate the model with the same dataset, or provide access to the model. In general, releasing code and data is often one good way to accomplish this, but reproducibility can also be provided via detailed instructions for how to replicate the results, access to a hosted model (e.g., in the case of a large language model), releasing of a model checkpoint, or other means that are appropriate to the research performed.
- While NeurIPS does not require releasing code, the conference does require all submissions to provide some reasonable avenue for reproducibility, which may depend on the nature of the contribution. For example
  - (a) If the contribution is primarily a new algorithm, the paper should make it clear how to reproduce that algorithm.
  - (b) If the contribution is primarily a new model architecture, the paper should describe the architecture clearly and fully.
  - (c) If the contribution is a new model (e.g., a large language model), then there should either be a way to access this model for reproducing the results or a way to reproduce the model (e.g., with an open-source dataset or instructions for how to construct the dataset).
  - (d) We recognize that reproducibility may be tricky in some cases, in which case authors are welcome to describe the particular way they provide for reproducibility. In the case of closed-source models, it may be that access to the model is limited in some way (e.g., to registered users), but it should be possible for other researchers to have some path to reproducing or verifying the results.

## 5. Open access to data and code

Question: Does the paper provide open access to the data and code, with sufficient instructions to faithfully reproduce the main experimental results, as described in supplemental material?

Answer: [NA]

Justification: Some of the code and data is confidential.

Guidelines:

- The answer NA means that paper does not include experiments requiring code.
- Please see the NeurIPS code and data submission guidelines (<https://nips.cc/public/guides/CodeSubmissionPolicy>) for more details.
- While we encourage the release of code and data, we understand that this might not be possible, so “No” is an acceptable answer. Papers cannot be rejected simply for not including code, unless this is central to the contribution (e.g., for a new open-source benchmark).
- The instructions should contain the exact command and environment needed to run to reproduce the results. See the NeurIPS code and data submission guidelines (<https://nips.cc/public/guides/CodeSubmissionPolicy>) for more details.
- The authors should provide instructions on data access and preparation, including how to access the raw data, preprocessed data, intermediate data, and generated data, etc.
- The authors should provide scripts to reproduce all experimental results for the new proposed method and baselines. If only a subset of experiments are reproducible, they should state which ones are omitted from the script and why.
- At submission time, to preserve anonymity, the authors should release anonymized versions (if applicable).

- Providing as much information as possible in supplemental material (appended to the paper) is recommended, but including URLs to data and code is permitted.

## 6. Experimental setting/details

Question: Does the paper specify all the training and test details (e.g., data splits, hyper-parameters, how they were chosen, type of optimizer, etc.) necessary to understand the results?

Answer: [\[Yes\]](#)

Justification: We have included all the information to the experiment details. Due to the limitation of pages in the main paper, we moved some of them to the supplementary material.

Guidelines:

- The answer NA means that the paper does not include experiments.
- The experimental setting should be presented in the core of the paper to a level of detail that is necessary to appreciate the results and make sense of them.
- The full details can be provided either with the code, in appendix, or as supplemental material.

## 7. Experiment statistical significance

Question: Does the paper report error bars suitably and correctly defined or other appropriate information about the statistical significance of the experiments?

Answer: [\[Yes\]](#)

Justification: We reported error bars suitably and correctly defined.

Guidelines:

- The answer NA means that the paper does not include experiments.
- The authors should answer "Yes" if the results are accompanied by error bars, confidence intervals, or statistical significance tests, at least for the experiments that support the main claims of the paper.
- The factors of variability that the error bars are capturing should be clearly stated (for example, train/test split, initialization, random drawing of some parameter, or overall run with given experimental conditions).
- The method for calculating the error bars should be explained (closed form formula, call to a library function, bootstrap, etc.)
- The assumptions made should be given (e.g., Normally distributed errors).
- It should be clear whether the error bar is the standard deviation or the standard error of the mean.
- It is OK to report 1-sigma error bars, but one should state it. The authors should preferably report a 2-sigma error bar than state that they have a 96% CI, if the hypothesis of Normality of errors is not verified.
- For asymmetric distributions, the authors should be careful not to show in tables or figures symmetric error bars that would yield results that are out of range (e.g. negative error rates).
- If error bars are reported in tables or plots, The authors should explain in the text how they were calculated and reference the corresponding figures or tables in the text.

## 8. Experiments compute resources

Question: For each experiment, does the paper provide sufficient information on the computer resources (type of compute workers, memory, time of execution) needed to reproduce the experiments?

Answer: [\[Yes\]](#)

Justification: We have a table to provide information on the computer resources.

Guidelines:

- The answer NA means that the paper does not include experiments.
- The paper should indicate the type of compute workers CPU or GPU, internal cluster, or cloud provider, including relevant memory and storage.

- The paper should provide the amount of compute required for each of the individual experimental runs as well as estimate the total compute.
- The paper should disclose whether the full research project required more compute than the experiments reported in the paper (e.g., preliminary or failed experiments that didn't make it into the paper).

## 9. Code of ethics

Question: Does the research conducted in the paper conform, in every respect, with the NeurIPS Code of Ethics <https://neurips.cc/public/EthicsGuidelines?>

Answer: [Yes]

Justification: The research conducted in the paper conform, in every respect, with the NeurIPS Code of Ethics.

Guidelines:

- The answer NA means that the authors have not reviewed the NeurIPS Code of Ethics.
- If the authors answer No, they should explain the special circumstances that require a deviation from the Code of Ethics.
- The authors should make sure to preserve anonymity (e.g., if there is a special consideration due to laws or regulations in their jurisdiction).

## 10. Broader impacts

Question: Does the paper discuss both potential positive societal impacts and negative societal impacts of the work performed?

Answer: [Yes]

Justification: This work has no negative societal impact.

Guidelines:

- The answer NA means that there is no societal impact of the work performed.
- If the authors answer NA or No, they should explain why their work has no societal impact or why the paper does not address societal impact.
- Examples of negative societal impacts include potential malicious or unintended uses (e.g., disinformation, generating fake profiles, surveillance), fairness considerations (e.g., deployment of technologies that could make decisions that unfairly impact specific groups), privacy considerations, and security considerations.
- The conference expects that many papers will be foundational research and not tied to particular applications, let alone deployments. However, if there is a direct path to any negative applications, the authors should point it out. For example, it is legitimate to point out that an improvement in the quality of generative models could be used to generate deepfakes for disinformation. On the other hand, it is not needed to point out that a generic algorithm for optimizing neural networks could enable people to train models that generate Deepfakes faster.
- The authors should consider possible harms that could arise when the technology is being used as intended and functioning correctly, harms that could arise when the technology is being used as intended but gives incorrect results, and harms following from (intentional or unintentional) misuse of the technology.
- If there are negative societal impacts, the authors could also discuss possible mitigation strategies (e.g., gated release of models, providing defenses in addition to attacks, mechanisms for monitoring misuse, mechanisms to monitor how a system learns from feedback over time, improving the efficiency and accessibility of ML).

## 11. Safeguards

Question: Does the paper describe safeguards that have been put in place for responsible release of data or models that have a high risk for misuse (e.g., pretrained language models, image generators, or scraped datasets)?

Answer: [NA]

Justification: No.

Guidelines:

- The answer NA means that the paper poses no such risks.
- Released models that have a high risk for misuse or dual-use should be released with necessary safeguards to allow for controlled use of the model, for example by requiring that users adhere to usage guidelines or restrictions to access the model or implementing safety filters.
- Datasets that have been scraped from the Internet could pose safety risks. The authors should describe how they avoided releasing unsafe images.
- We recognize that providing effective safeguards is challenging, and many papers do not require this, but we encourage authors to take this into account and make a best faith effort.

## 12. Licenses for existing assets

Question: Are the creators or original owners of assets (e.g., code, data, models), used in the paper, properly credited and are the license and terms of use explicitly mentioned and properly respected?

Answer: [Yes]

Justification: All the open accessed code we used has been properly cited.

Guidelines:

- The answer NA means that the paper does not use existing assets.
- The authors should cite the original paper that produced the code package or dataset.
- The authors should state which version of the asset is used and, if possible, include a URL.
- The name of the license (e.g., CC-BY 4.0) should be included for each asset.
- For scraped data from a particular source (e.g., website), the copyright and terms of service of that source should be provided.
- If assets are released, the license, copyright information, and terms of use in the package should be provided. For popular datasets, [paperswithcode.com/datasets](https://paperswithcode.com/datasets) has curated licenses for some datasets. Their licensing guide can help determine the license of a dataset.
- For existing datasets that are re-packaged, both the original license and the license of the derived asset (if it has changed) should be provided.
- If this information is not available online, the authors are encouraged to reach out to the asset's creators.

## 13. New assets

Question: Are new assets introduced in the paper well documented and is the documentation provided alongside the assets?

Answer: [NA]

Justification: No new assets introduced in the paper.

Guidelines:

- The answer NA means that the paper does not release new assets.
- Researchers should communicate the details of the dataset/code/model as part of their submissions via structured templates. This includes details about training, license, limitations, etc.
- The paper should discuss whether and how consent was obtained from people whose asset is used.
- At submission time, remember to anonymize your assets (if applicable). You can either create an anonymized URL or include an anonymized zip file.

## 14. Crowdsourcing and research with human subjects

Question: For crowdsourcing experiments and research with human subjects, does the paper include the full text of instructions given to participants and screenshots, if applicable, as well as details about compensation (if any)?

Answer: [NA]



865 Justification: There is no research with human subjects.

866 Guidelines:

- 867 • The answer NA means that the paper does not involve crowdsourcing nor research with
- 868 human subjects.
- 869 • Including this information in the supplemental material is fine, but if the main contribu-
- 870 tion of the paper involves human subjects, then as much detail as possible should be
- 871 included in the main paper.
- 872 • According to the NeurIPS Code of Ethics, workers involved in data collection, curation,
- 873 or other labor should be paid at least the minimum wage in the country of the data
- 874 collector.

875 **15. Institutional review board (IRB) approvals or equivalent for research with human**

876 **subjects**

877 Question: Does the paper describe potential risks incurred by study participants, whether

878 such risks were disclosed to the subjects, and whether Institutional Review Board (IRB)

879 approvals (or an equivalent approval/review based on the requirements of your country or

880 institution) were obtained?

881 Answer: [NA]

882 Justification: There is no research with human subjects.

883 Guidelines:

- 884 • The answer NA means that the paper does not involve crowdsourcing nor research with
- 885 human subjects.
- 886 • Depending on the country in which research is conducted, IRB approval (or equivalent)
- 887 may be required for any human subjects research. If you obtained IRB approval, you
- 888 should clearly state this in the paper.
- 889 • We recognize that the procedures for this may vary significantly between institutions
- 890 and locations, and we expect authors to adhere to the NeurIPS Code of Ethics and the
- 891 guidelines for their institution.
- 892 • For initial submissions, do not include any information that would break anonymity (if
- 893 applicable), such as the institution conducting the review.

894 **16. Declaration of LLM usage**

895 Question: Does the paper describe the usage of LLMs if it is an important, original, or

896 non-standard component of the core methods in this research? Note that if the LLM is used

897 only for writing, editing, or formatting purposes and does not impact the core methodology,

898 scientific rigor, or originality of the research, declaration is not required.

899 Answer: [NA]

900 Justification: The usage of LLMs is not an important, original, or non-standard component

901 of the core methods in this research

902 Guidelines:

- 903 • The answer NA means that the core method development in this research does not
- 904 involve LLMs as any important, original, or non-standard components.
- 905 • Please refer to our LLM policy (<https://neurips.cc/Conferences/2025/LLM>)
- 906 for what should or should not be described.
